# Supplementary material for: Ploidy-Seq: inferring mutational chronology by sequencing polyploid tumor subpopulations
Source: PubMed Central journal article supplement (PMC4343275; doi:10.1186/s13073-015-0127-5), 2015-01-28

# Supplemental Figure 1

Cell Counts

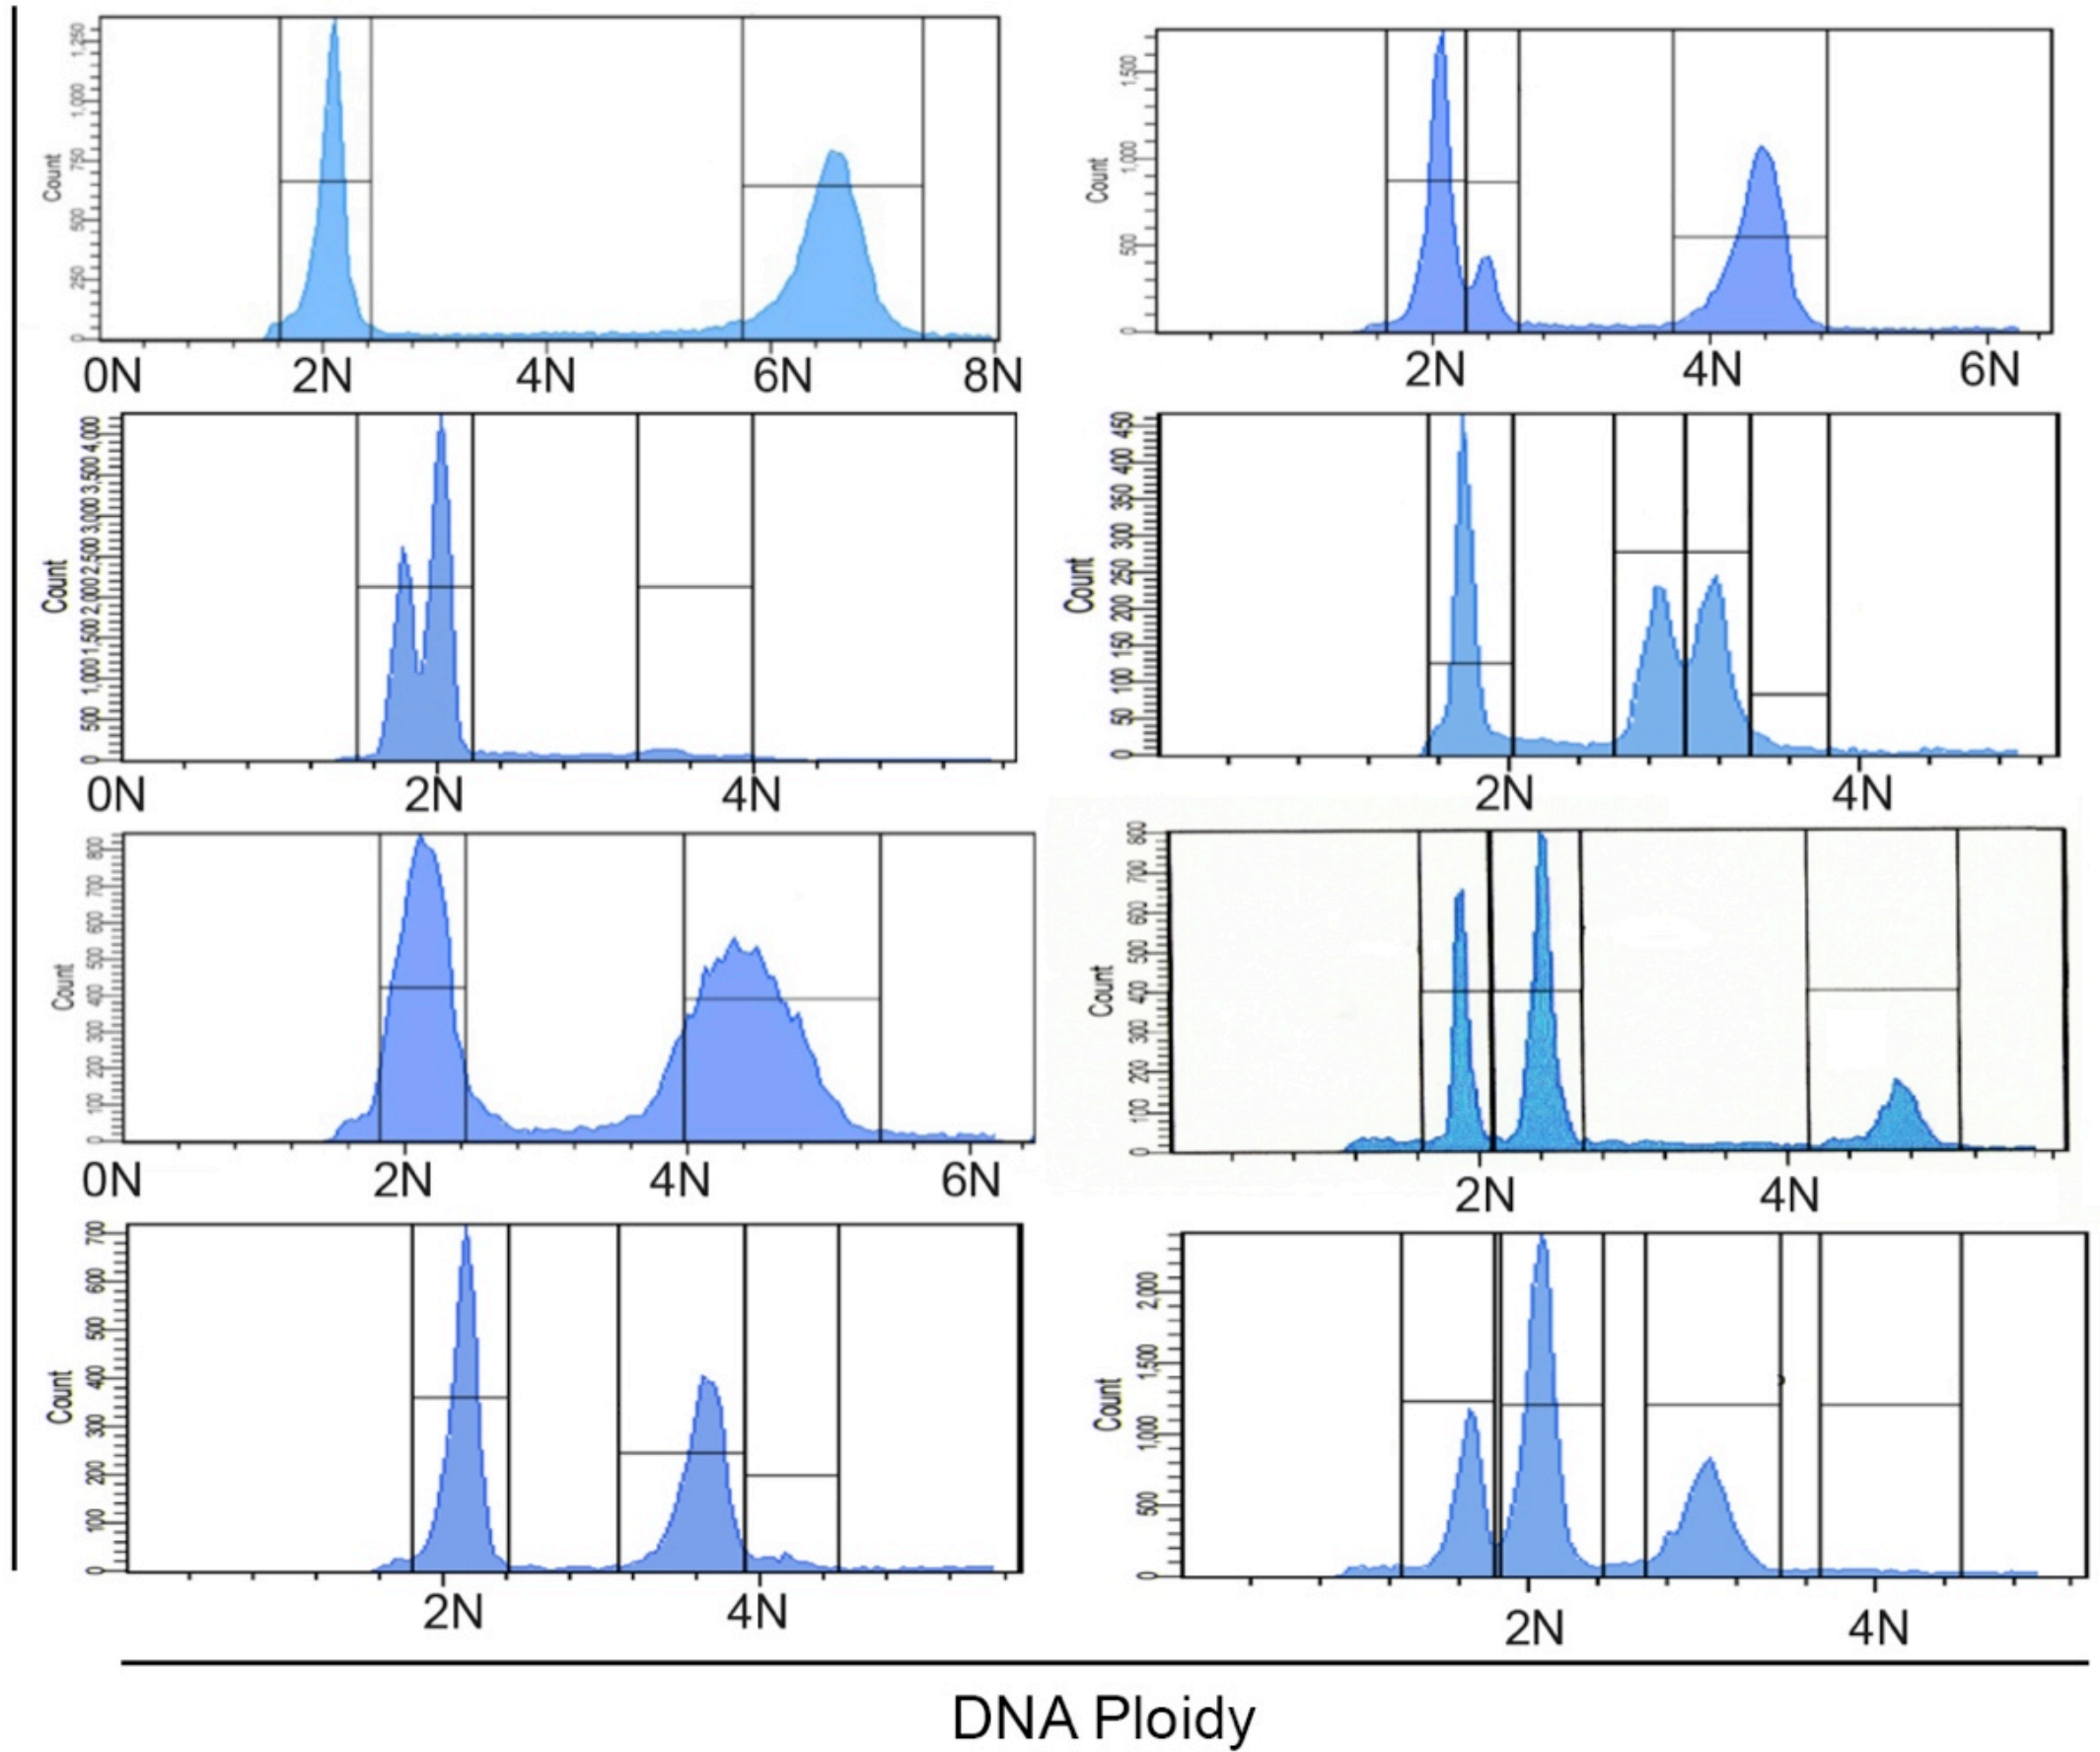

# Supplemental Figure 2

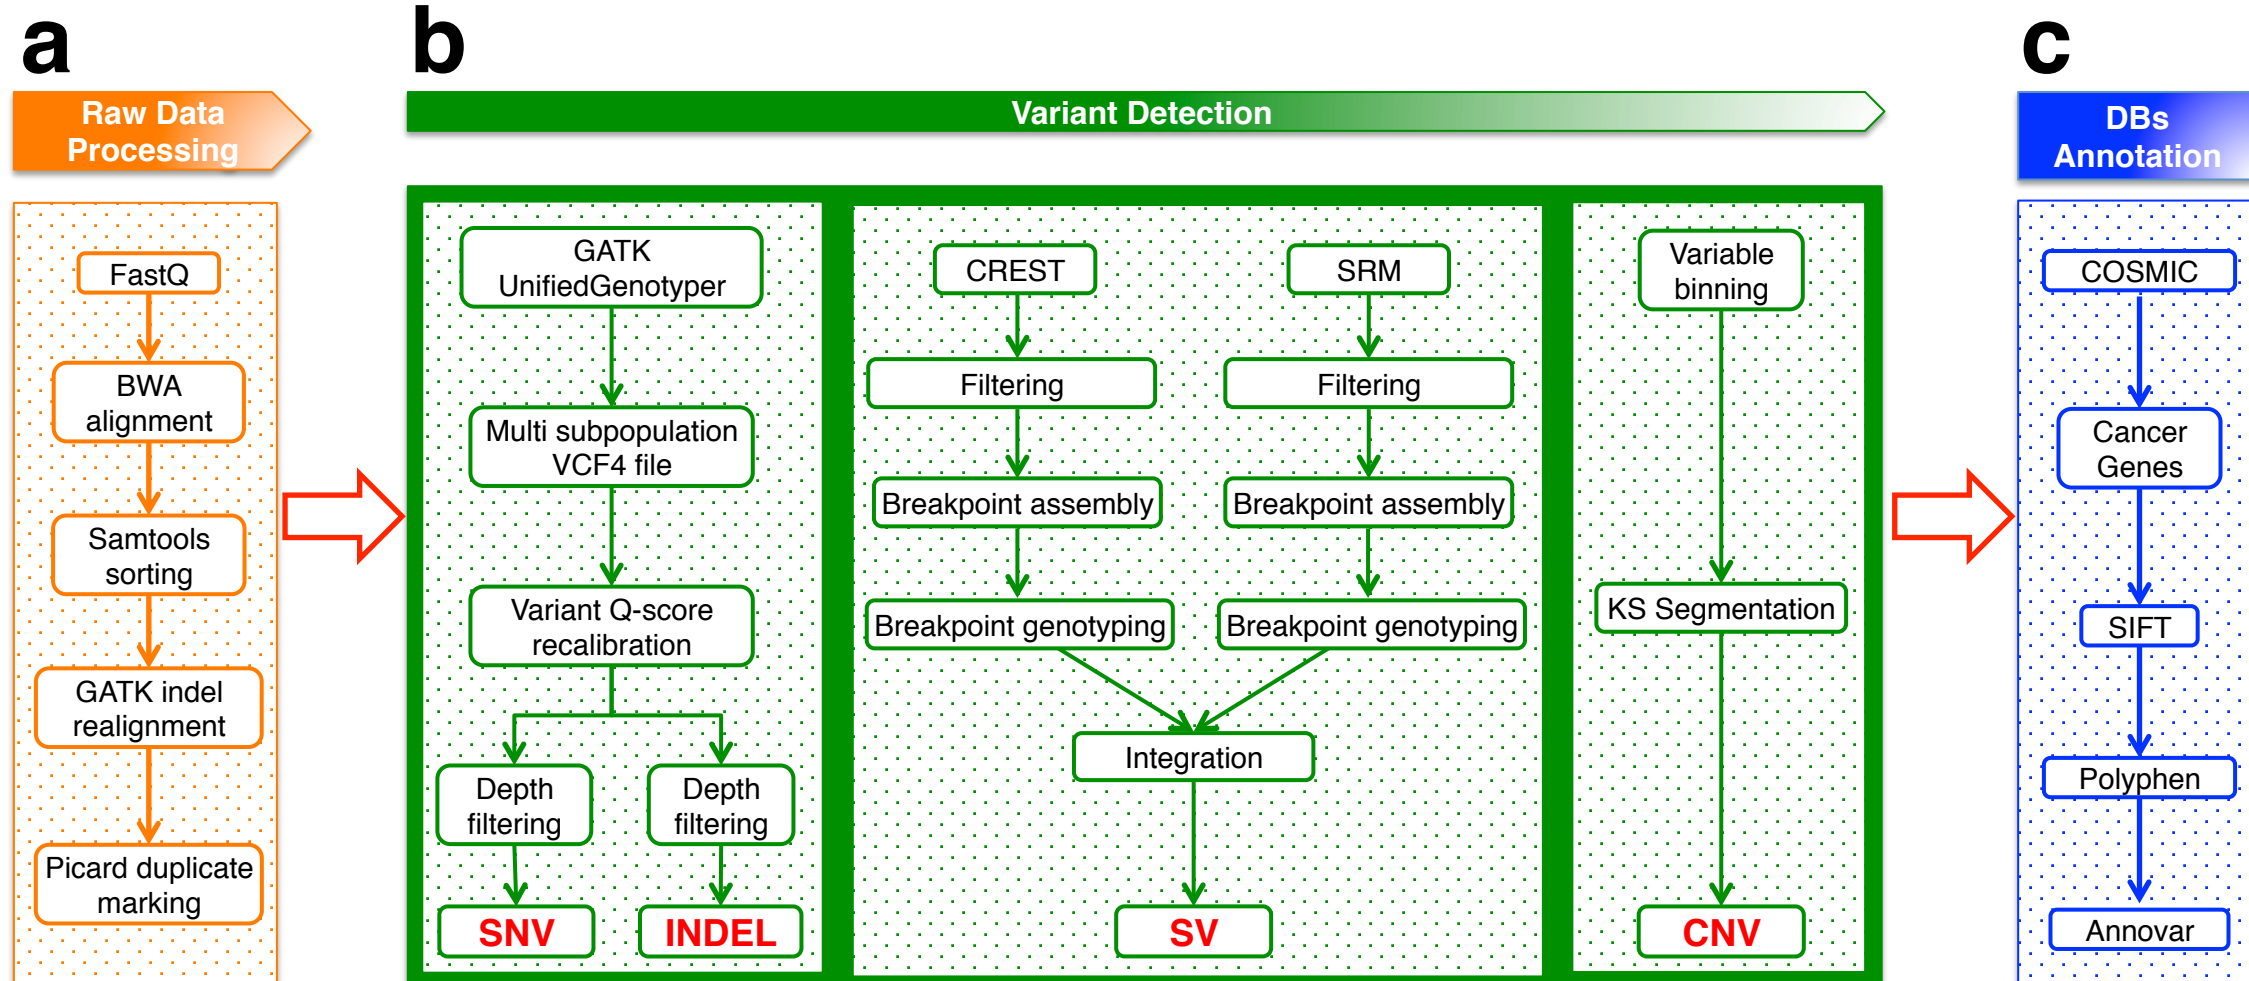

# Supplemental Figure 3

**a**

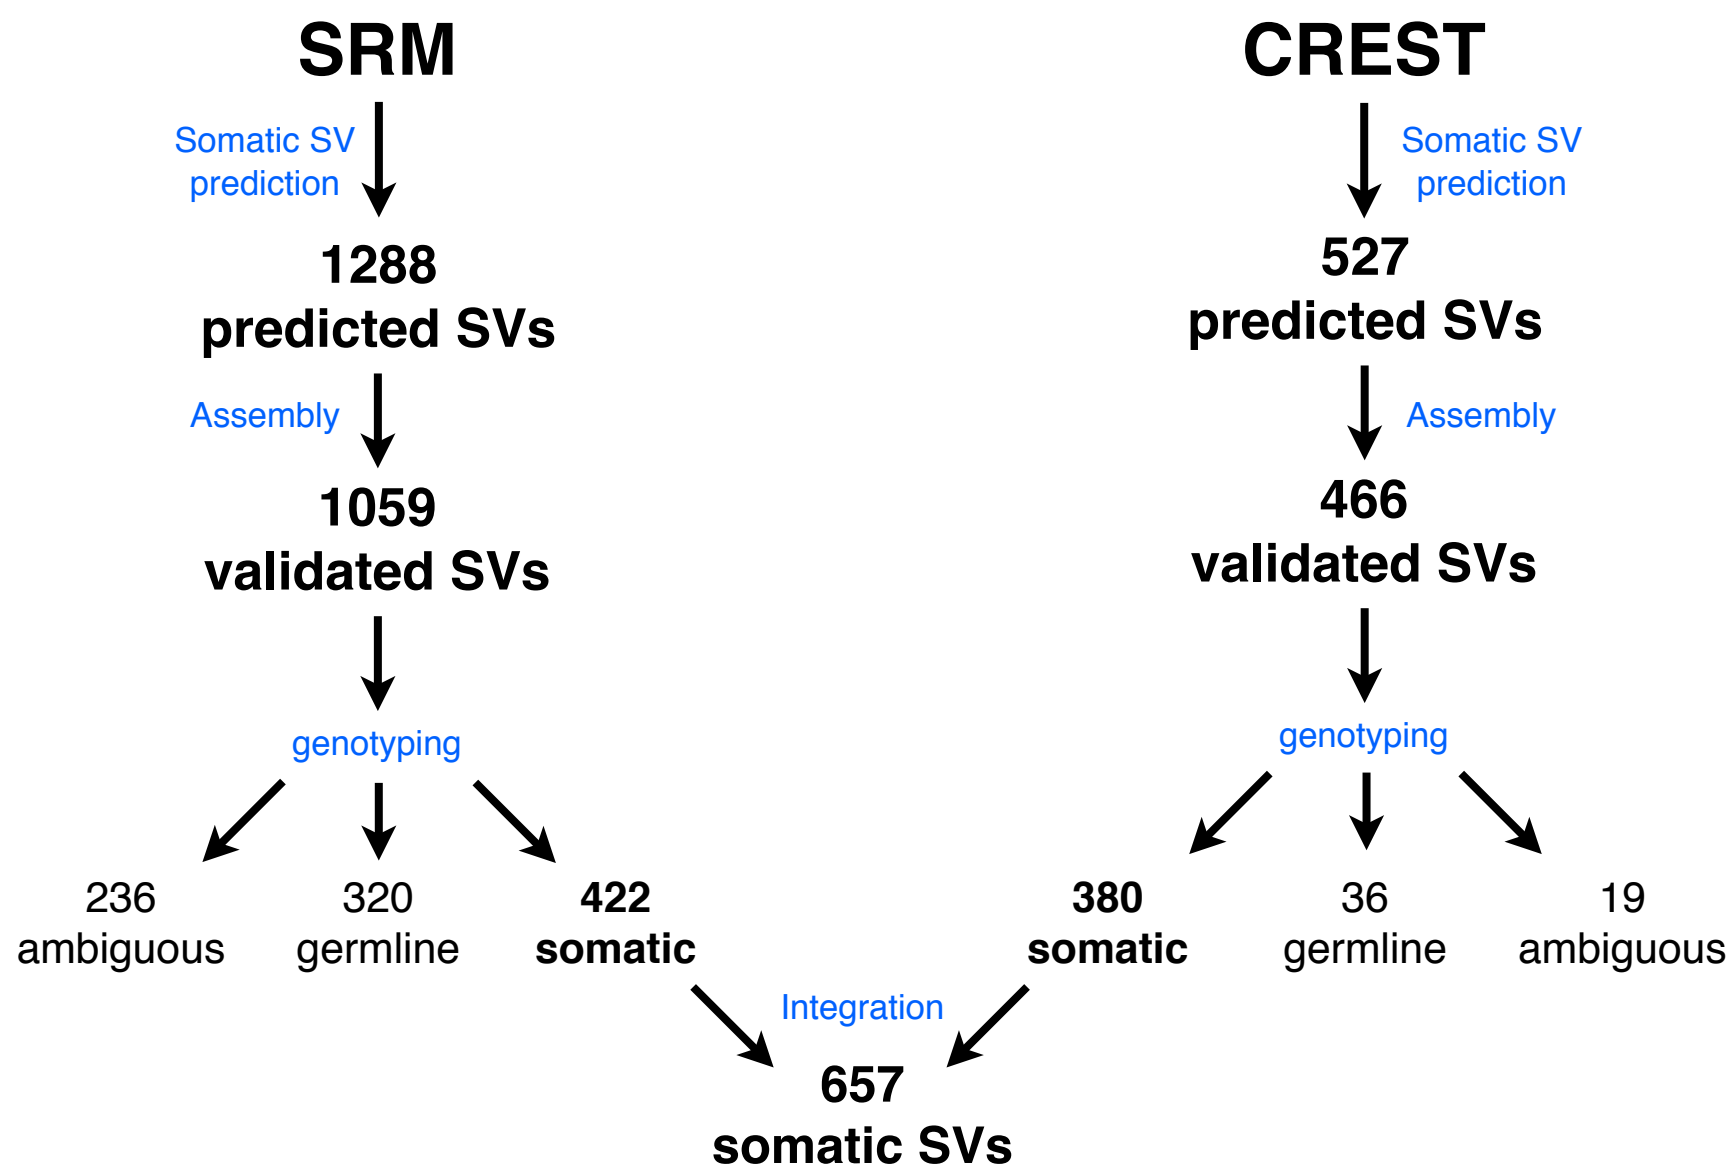

**b**

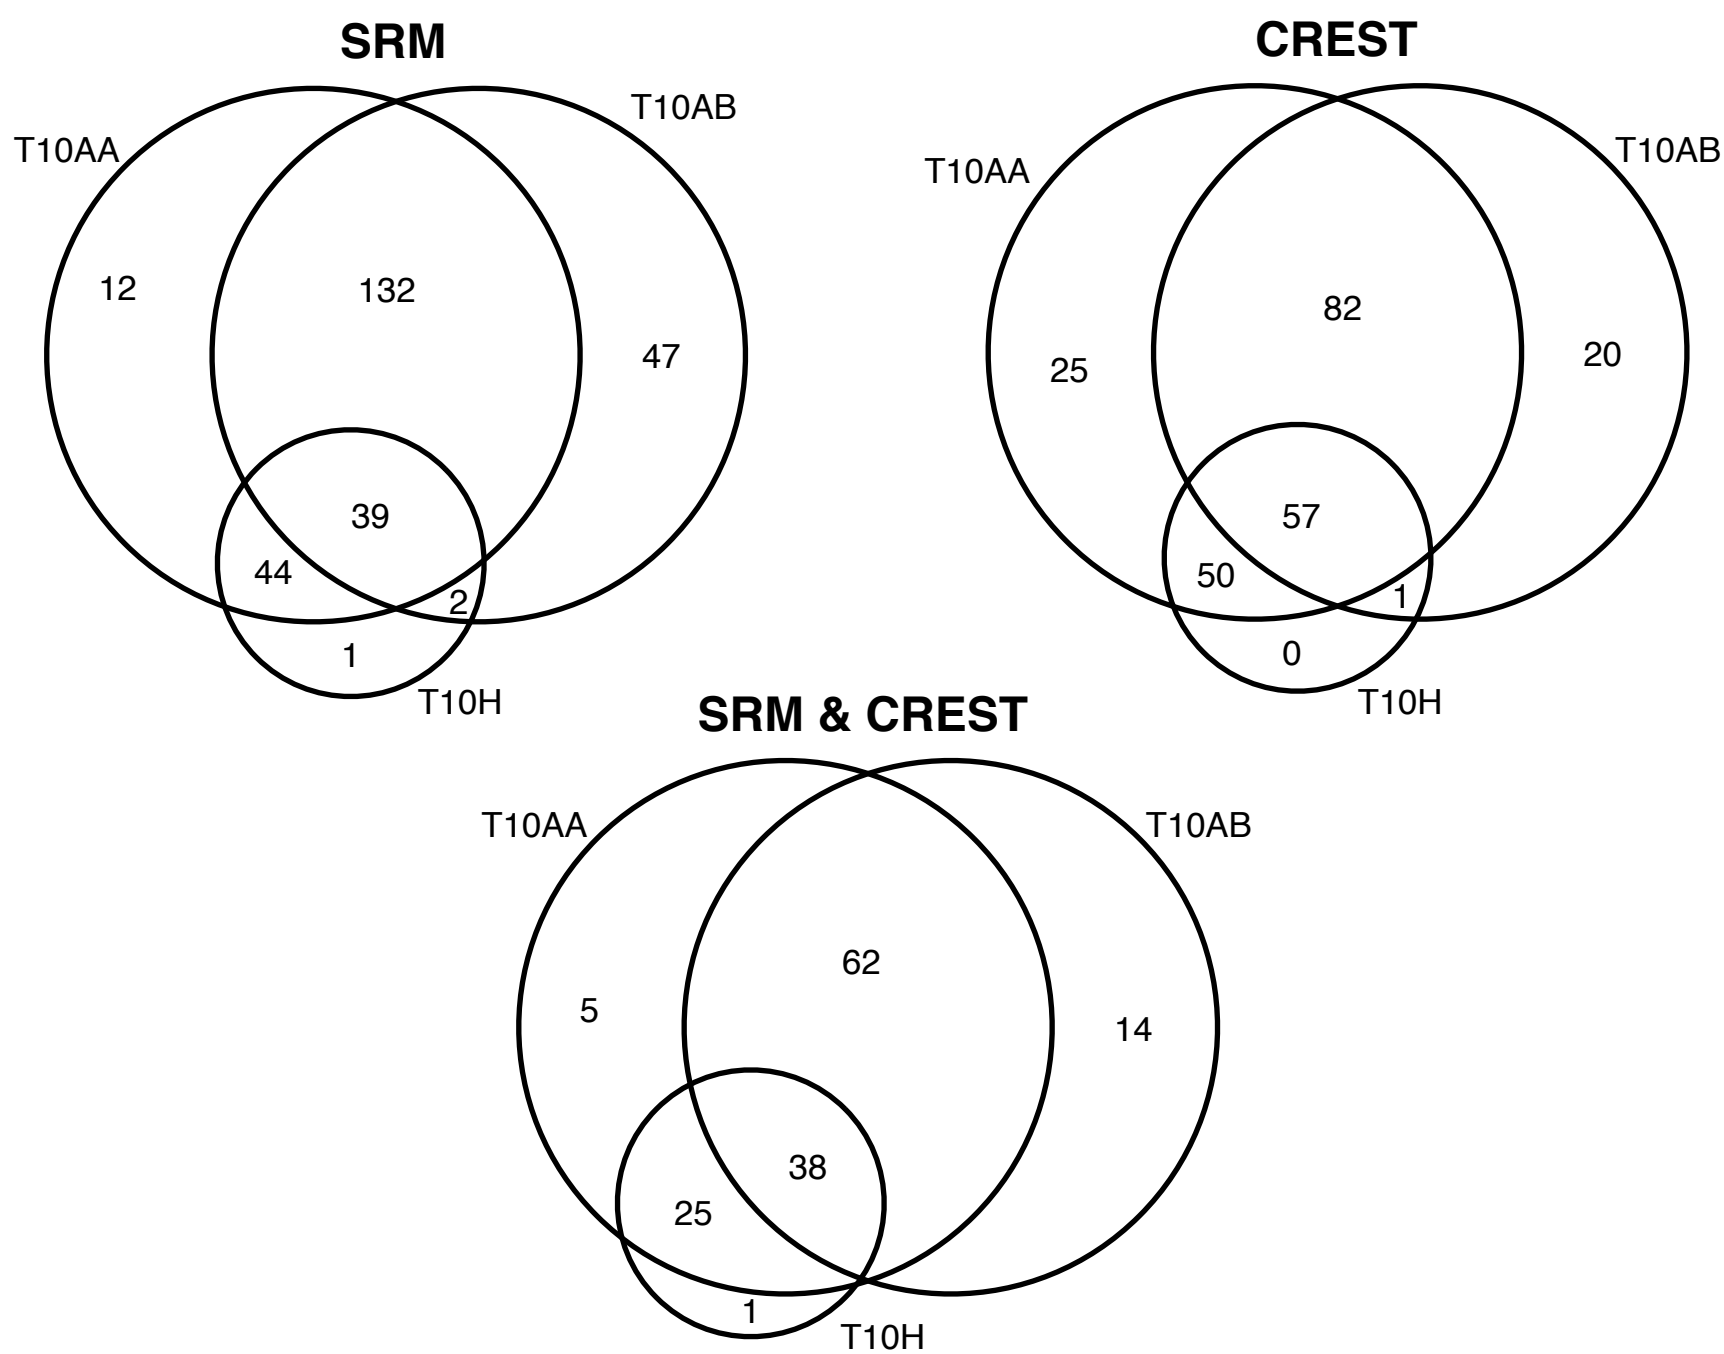

# Supplemental Figure 4

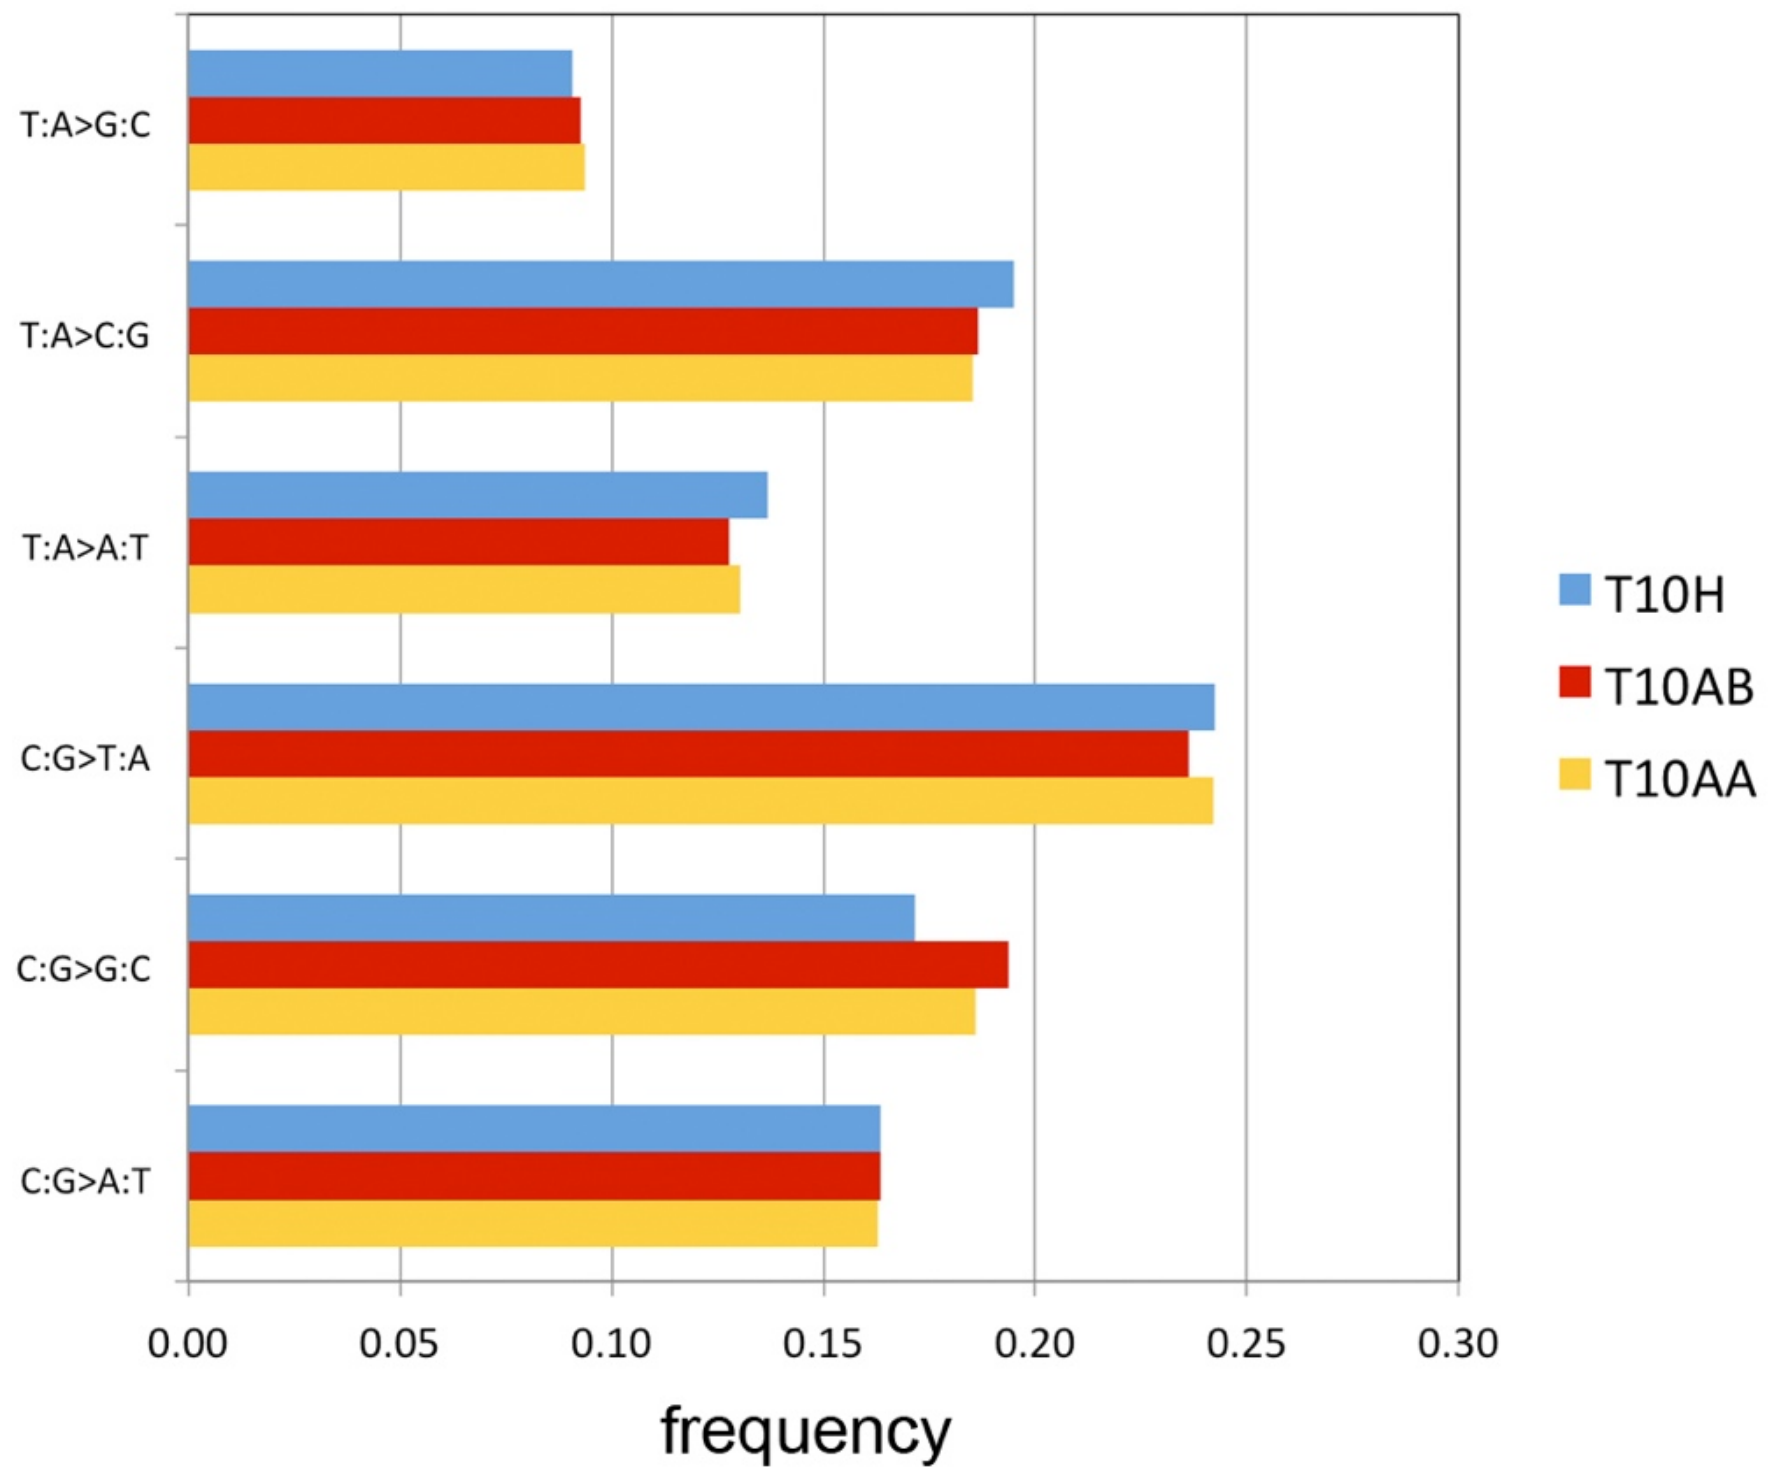

# Supplemental Figure 5

**a****SNV Count**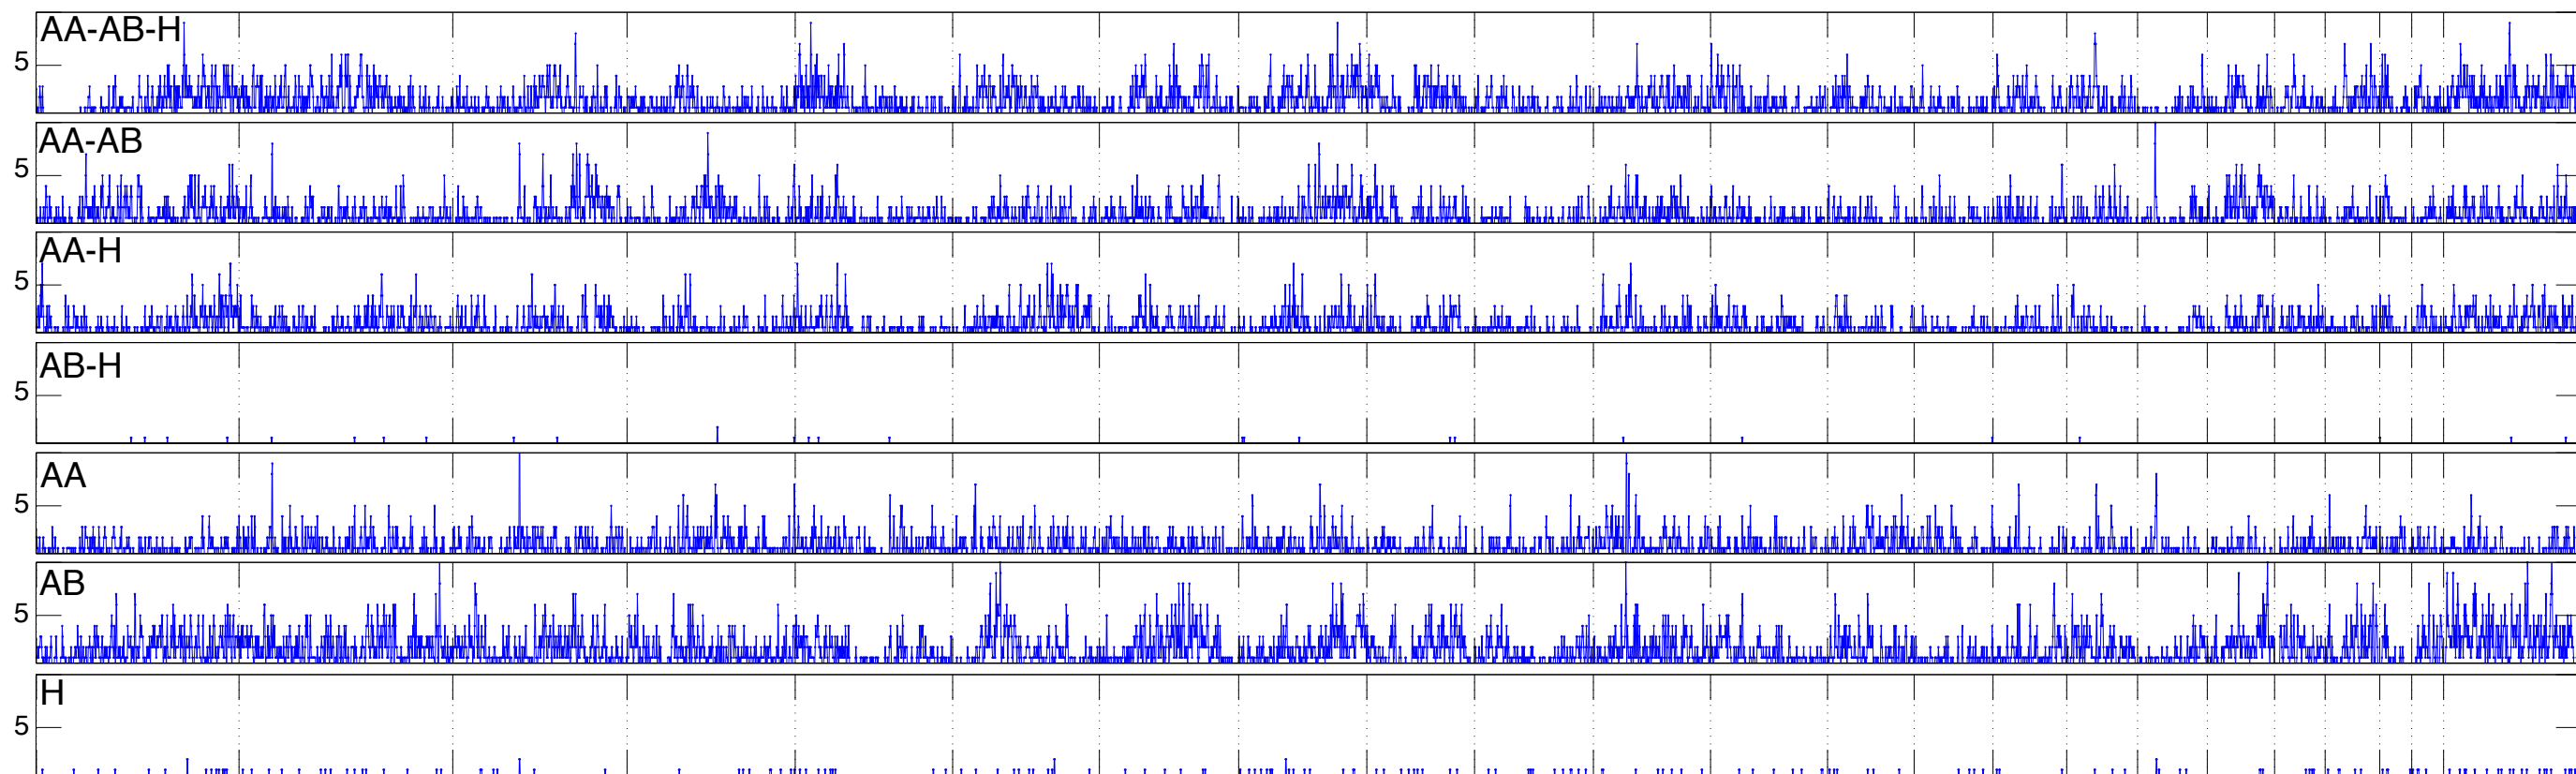**b****Mean Minor Allele Frequency (LOH)**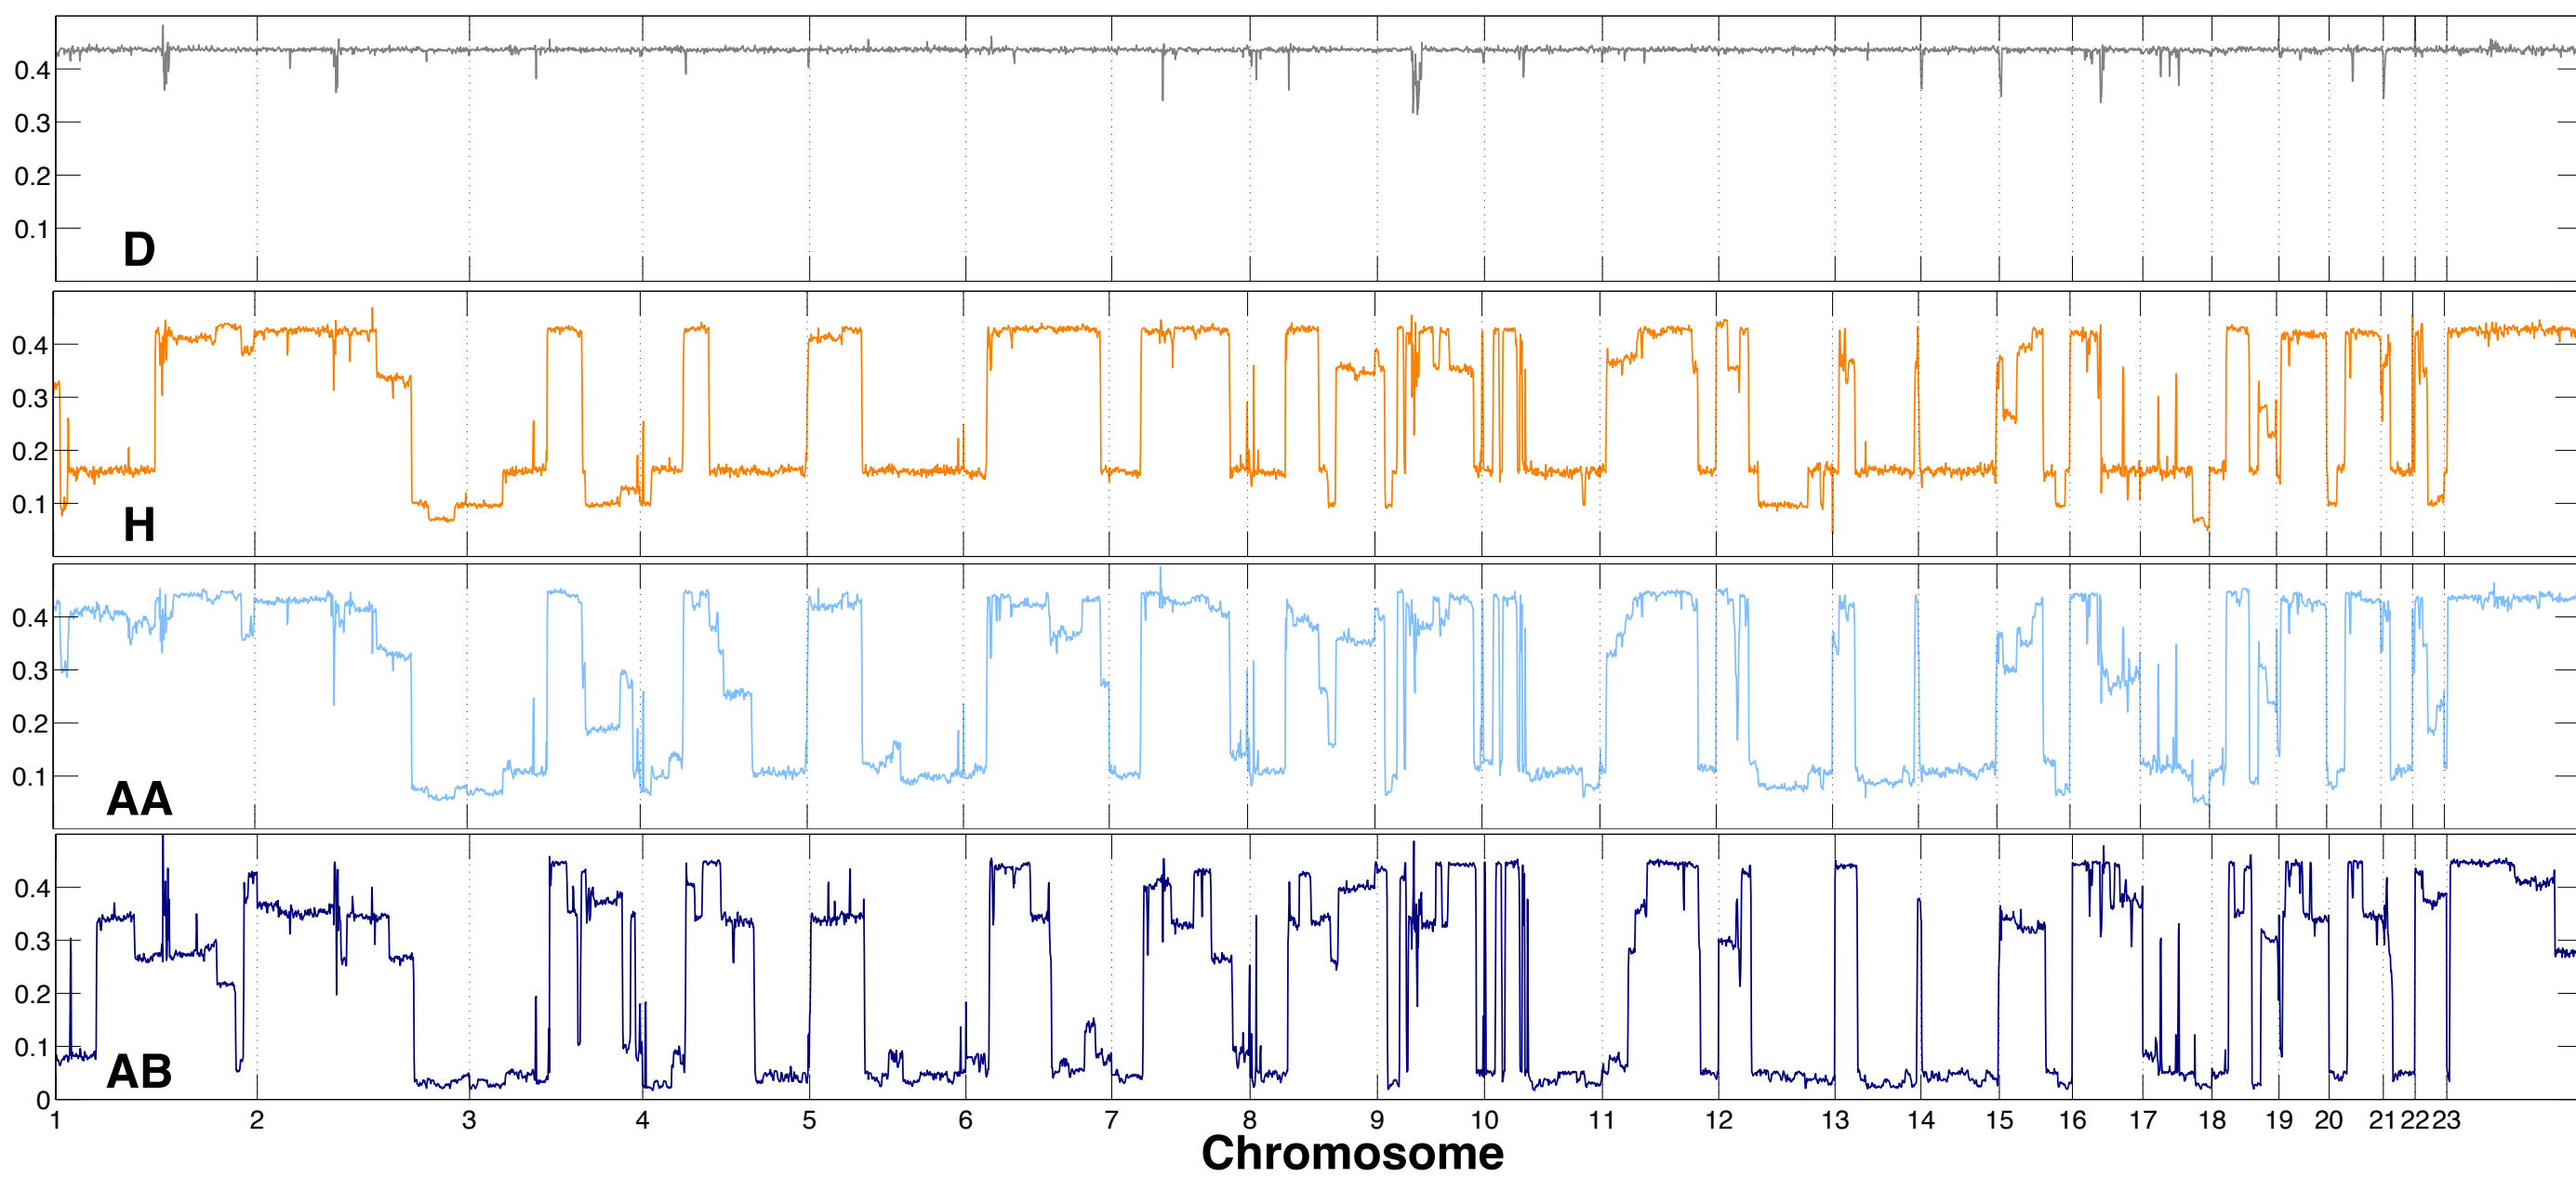

# Supplemental Figure 6

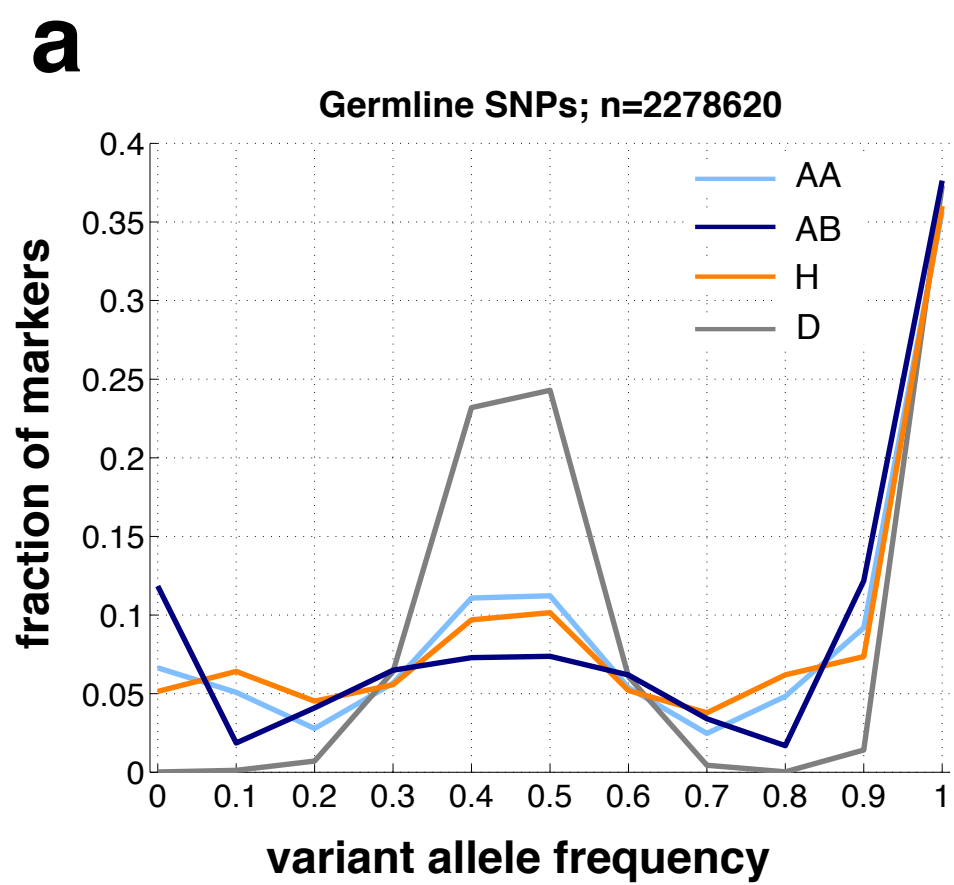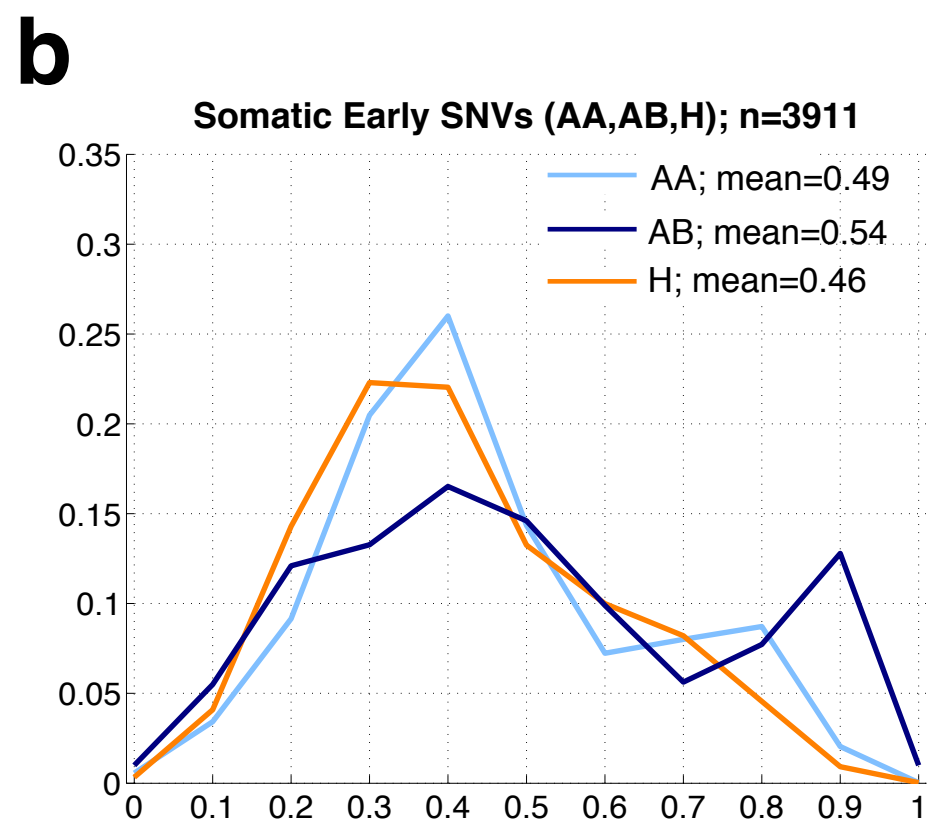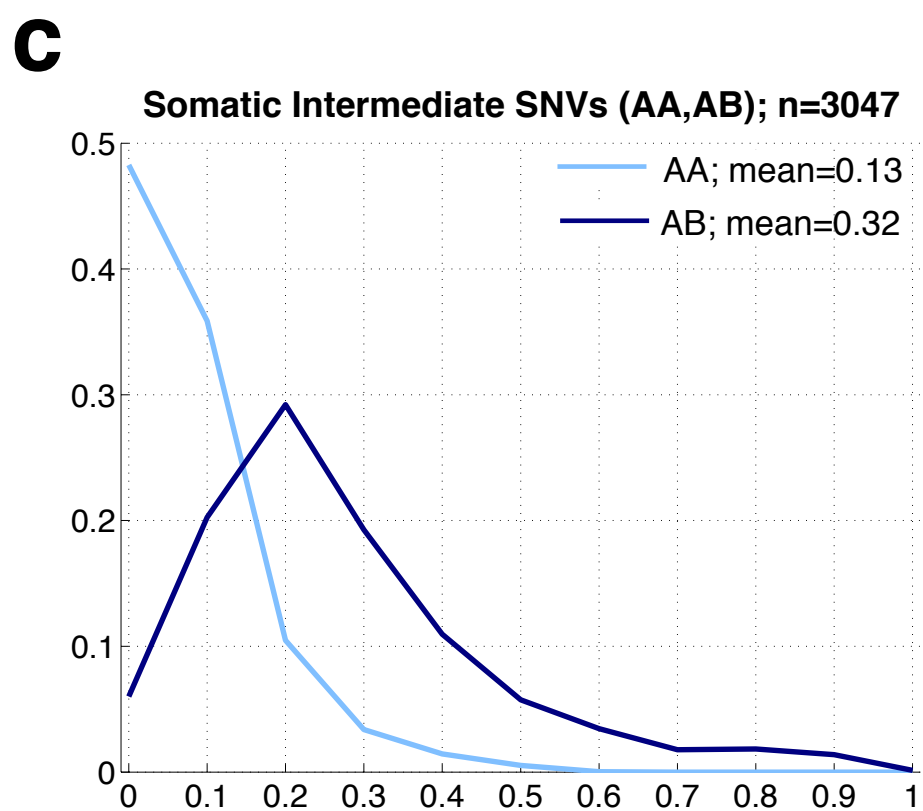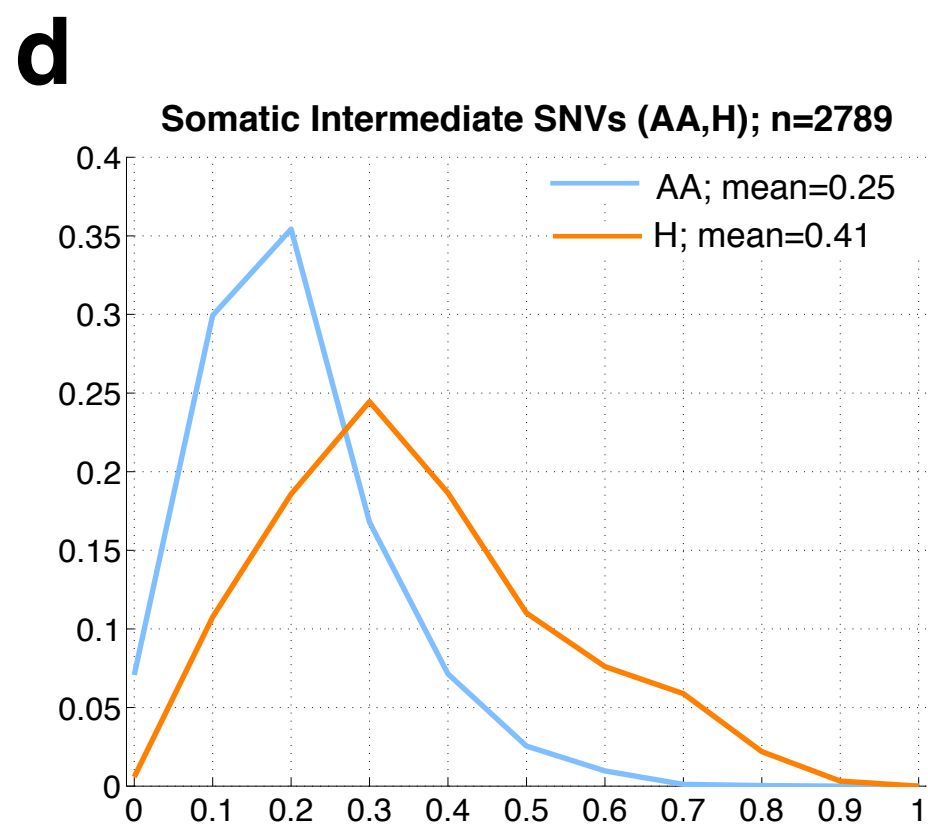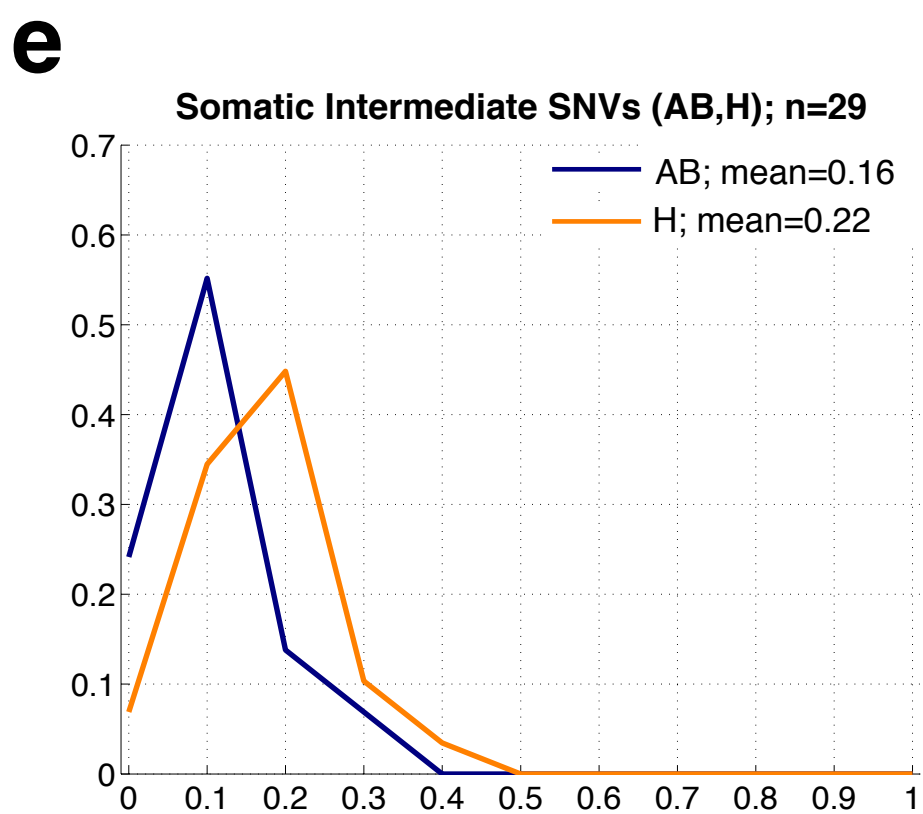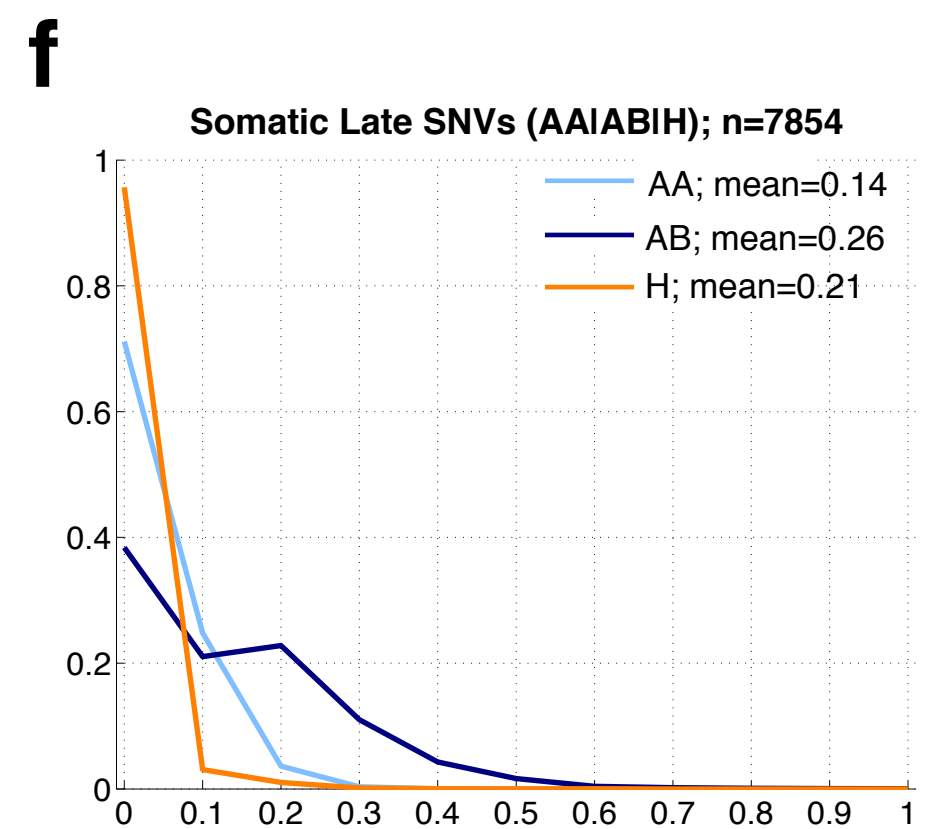

# Supplemental Figure 7

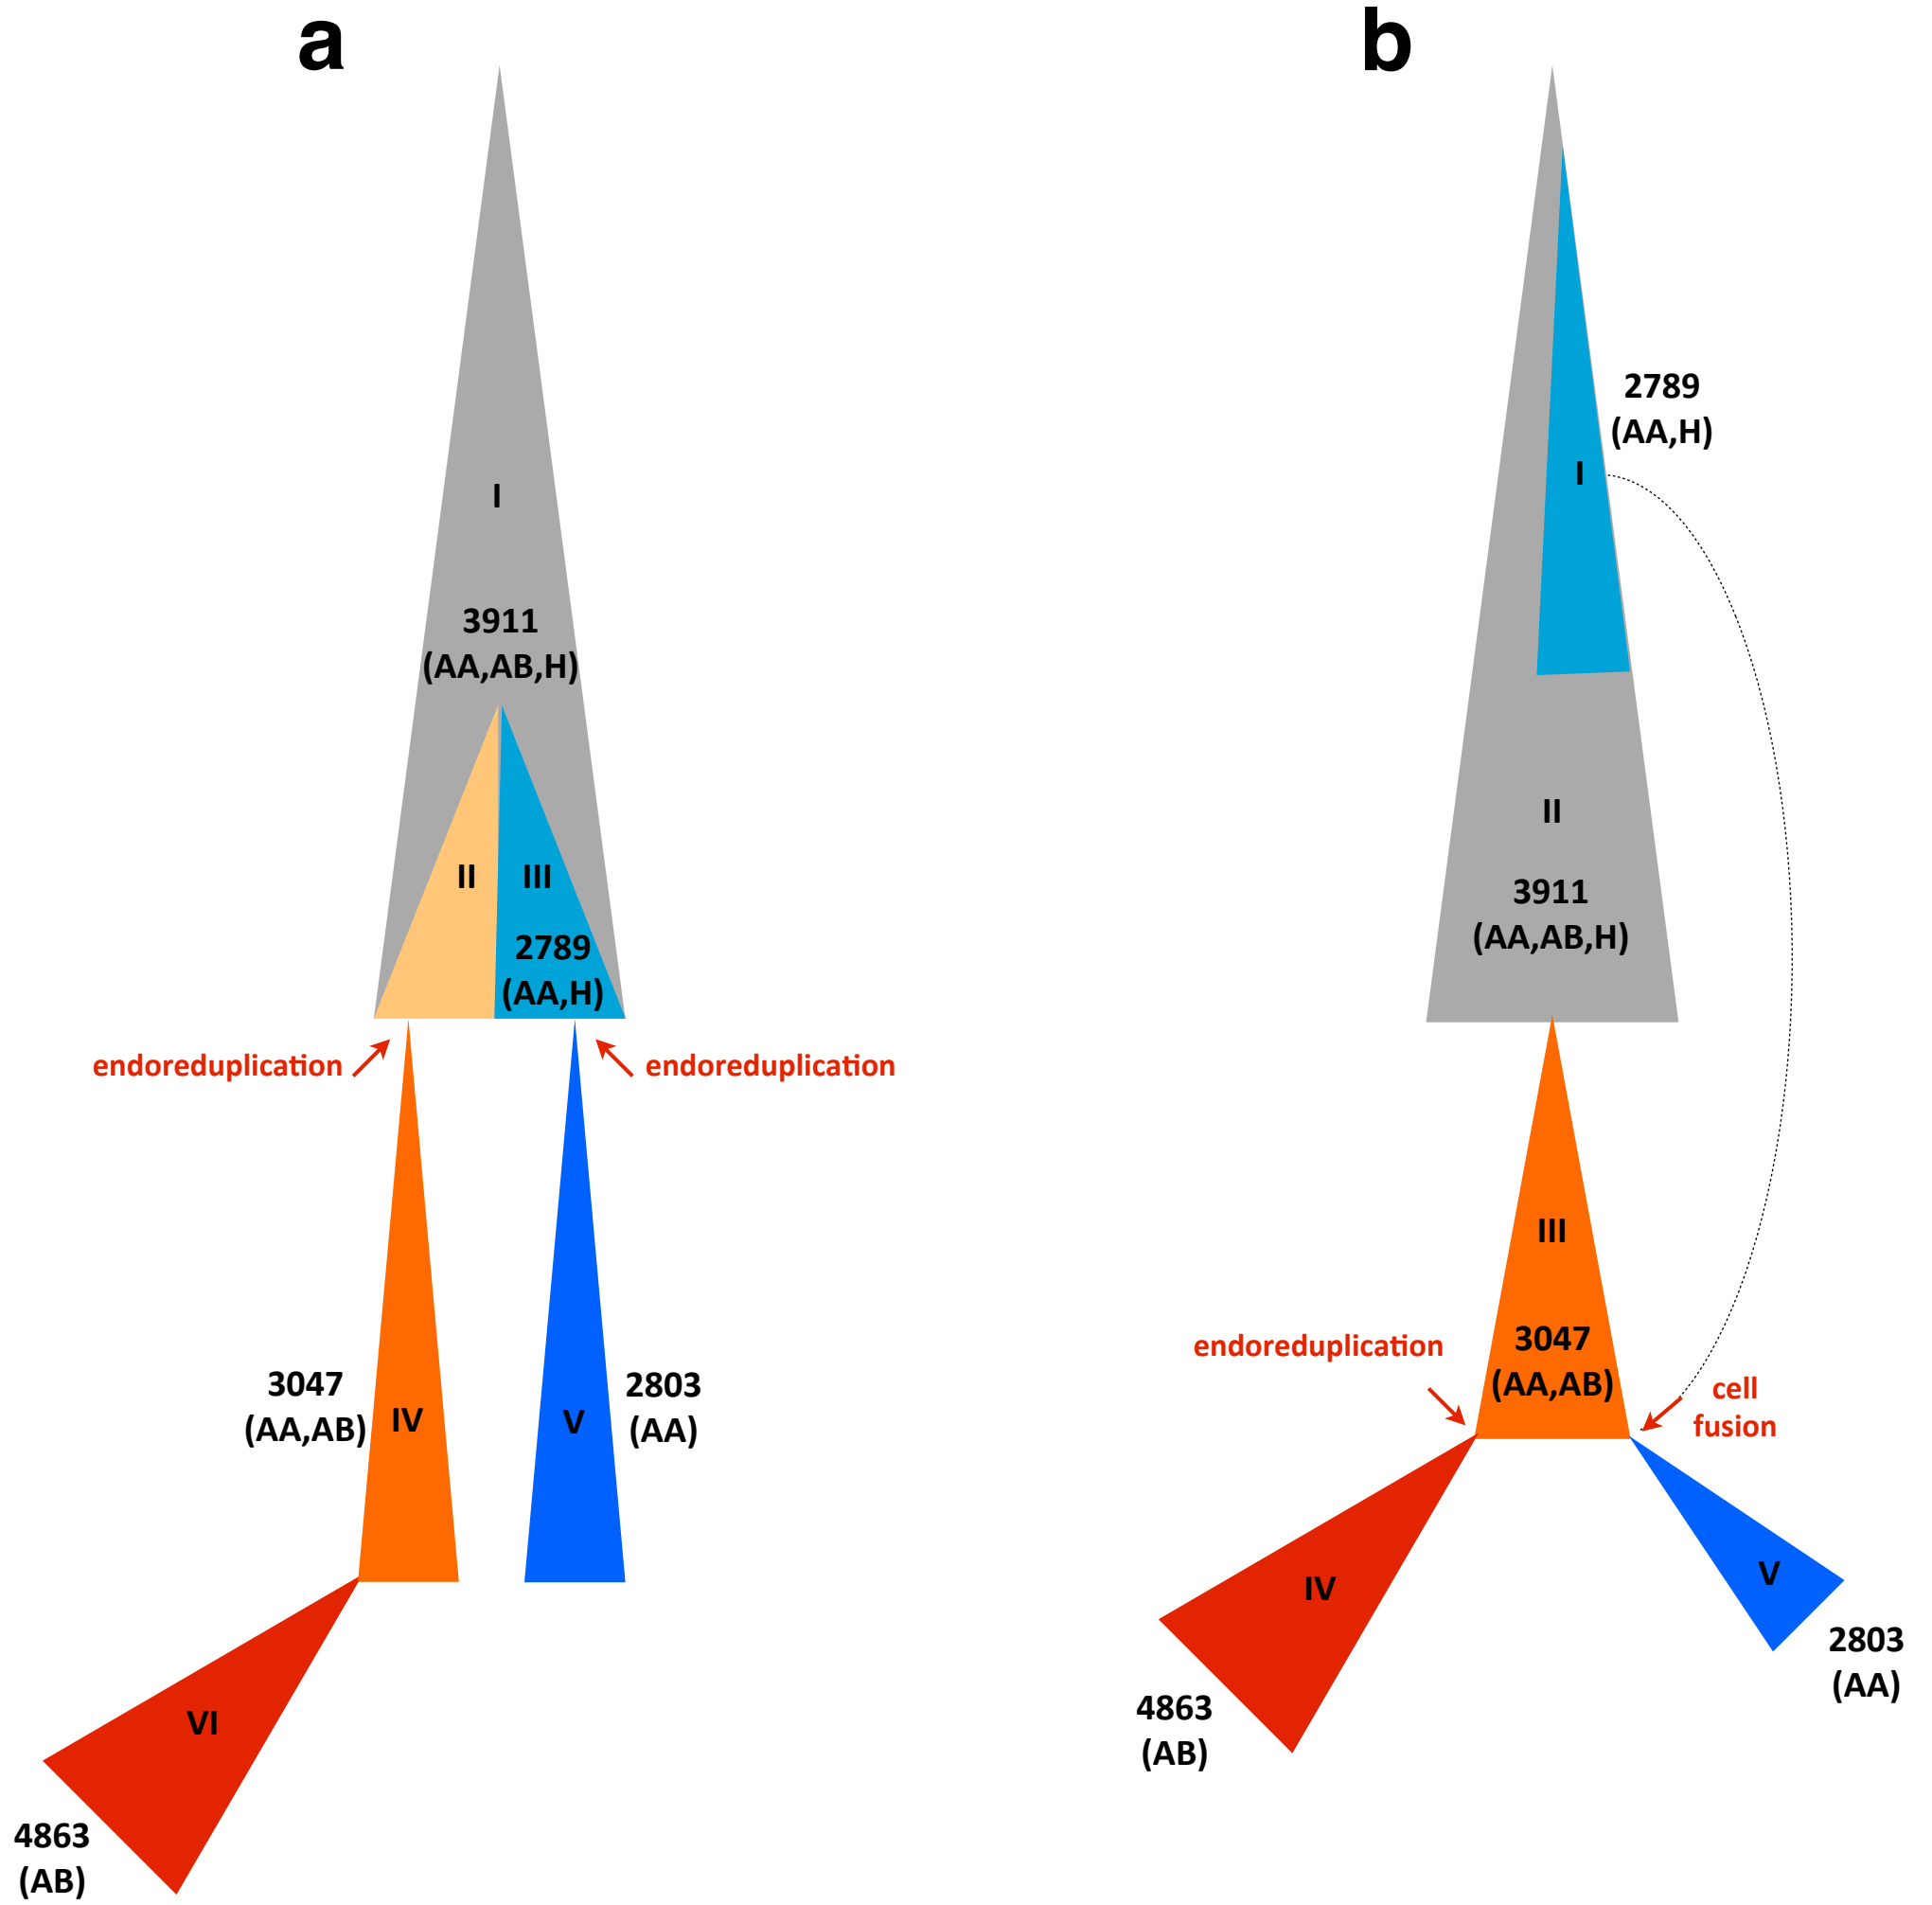

# Supplementary Figure 8

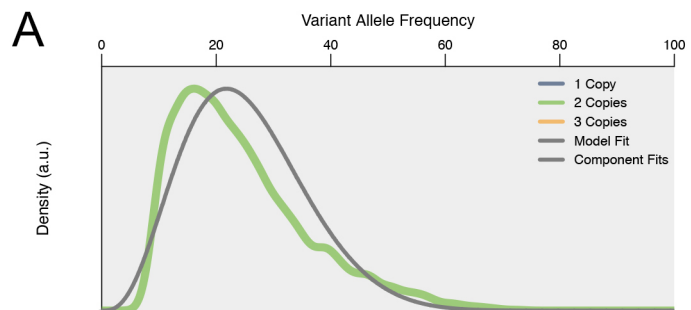

100X mixed populations

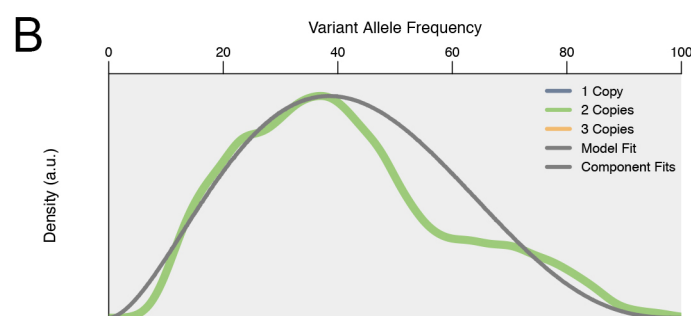

H subpopulation

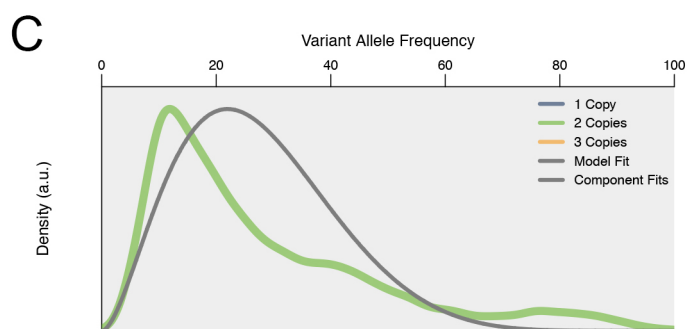

AA subpopulation

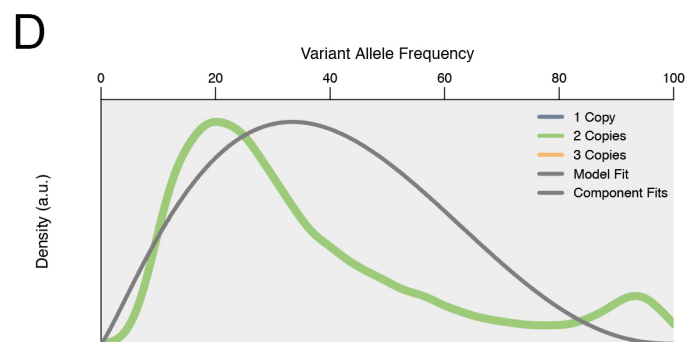

AB subpopulation



# Supplementary Figure 9

A

Mixed populations 30X depth

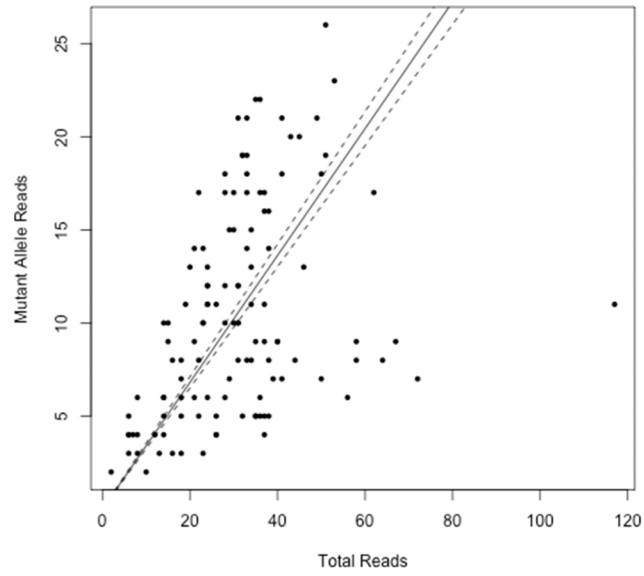

B

Mixed populations 50X depth

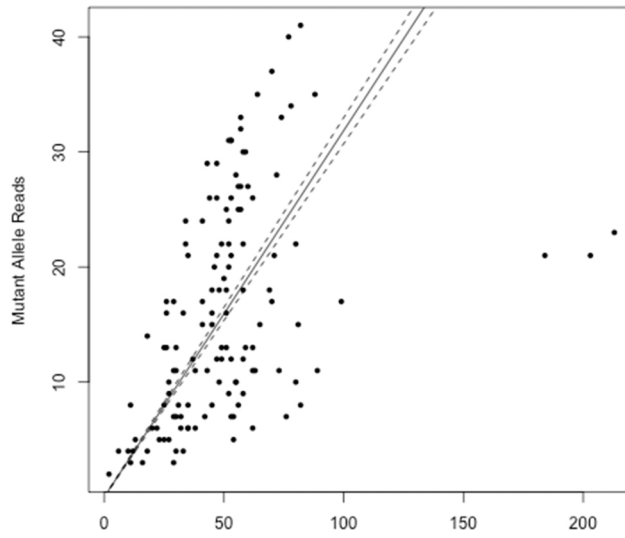

C

Mixed populations 100X depth

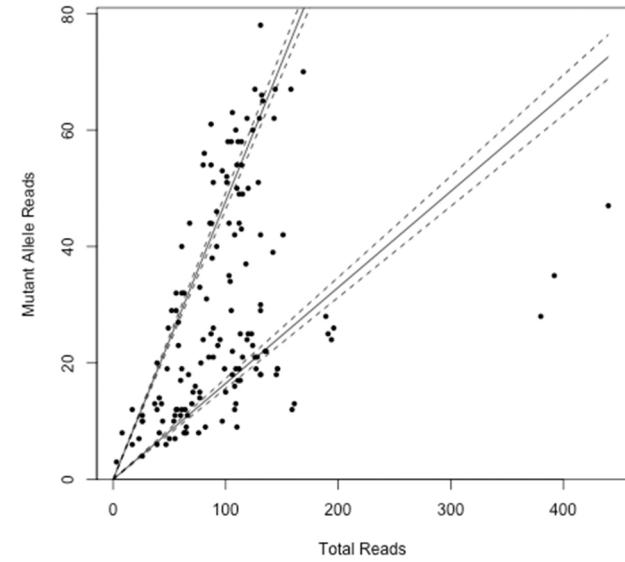

Supplement: 13073_2015_127_MOESM1_ESM.pdf [file 13073_2015_127_MOESM1_ESM.pdf]
