# Supplementary material for: Ploidy-Seq: inferring mutational chronology by sequencing polyploid tumor subpopulations
Source: PubMed Central journal article supplement (PMC4343275; doi:10.1186/s13073-015-0127-5), 2015-01-28
Supplement: 13073_2015_127_MOESM2_ESM.pdf [file 13073_2015_127_MOESM2_ESM.pdf]

**SUPPLEMENTAL TABLE1 - NONSYNONYMOUS POINT MUTATIONS DETECTED IN TUMOR SUBPOPULATIONS**

| <b>EARLY SNVs</b>         |           |           |                |     |     |    |    |    |    |         |           |         |          |      |                   |              |        |            |           |
|---------------------------|-----------|-----------|----------------|-----|-----|----|----|----|----|---------|-----------|---------|----------|------|-------------------|--------------|--------|------------|-----------|
| chr                       | start     | stop      | gene           | REF | VAR | D  | H  | AA | AB | sub     | CancerGer | Cosmic  | POLYPHEN | SIFT | Nonsynonymous     | GenBank      | Exon   | Nucleotide | AminoAcid |
| 1                         | 184313967 | 184313968 | HMCN1          | G   | C   | GG | GC | GC | GC | H_AA_AB | NA        | NA      | 0.991    | 0.06 | nonsynonymous SNV | NM_031935    | exon55 | c.G8591C   | p.R2864P  |
| 2                         | 47891000  | 47891001  | <b>FBXO11</b>  | G   | C   | GG | GC | GC | GC | H_AA_AB | FBXO11    | p.0?    | 0.995    | 0    | nonsynonymous SNV | NM_001190274 | exon19 | c.C2297G   | p.P766R   |
| 3                         | 113368862 | 113368862 | SLC9A10        | G   | T   | GG | TG | TG | TG | H_AA_AB | NA        | NA      | 0.949    | 0.03 | nonsynonymous SNV | NM_183061    | exon26 | c.C3260A   | p.T1087K  |
| 4                         | 74529590  | 74529591  | AFP            | A   | G   | AA | AG | AG | AG | H_AA_AB | NA        | NA      | 0.989    | 0    | nonsynonymous SNV | NM_001134    | exon7  | c.A730G    | p.S244G   |
| 6                         | 37444241  | 37444242  | RNF8           | C   | G   | CC | CG | CG | CG | H_AA_AB | NA        | NA      | 0.88     | 0    | nonsynonymous SNV | NM_003958    | exon3  | c.C244G    | p.L82V    |
| 7                         | 98966928  | 98966929  | ZKSCAN5        | G   | C   | GG | CG | CG | CG | H_AA_AB | NA        | NA      | 0.991    | 0.04 | nonsynonymous SNV | NM_145102    | exon7  | c.G1640C   | p.R547T   |
| 8                         | 105430187 | 105430188 | TM7SF4         | T   | A   | TT | AT | AT | AT | H_AA_AB | NA        | NA      | 0.984    | 0.06 | nonsynonymous SNV | NM_030788    | exon2  | c.T231A    | p.H77Q    |
| 8                         | 146128603 | 146128603 | ZNF16          | C   | G   | CC | CG | CG | CG | H_AA_AB | NA        | NA      | 0.932    | 0    | nonsynonymous SNV | NM_006958    | exon3  | c.G374C    | p.R125T   |
| 10                        | 112339680 | 112339680 | <b>SMC3</b>    | G   | C   | GG | CG | CG | CG | H_AA_AB | SMC3      | NA      | 0.187    | 0.16 | nonsynonymous SNV | NM_005445    | exon15 | c.G1450C   | p.A484P   |
| 11                        | 61327496  | 61327496  | FADS1          | C   | G   | CC | GC | GC | GC | H_AA_AB | NA        | NA      | 0.999    | NA   | nonsynonymous SNV | NM_013402    | exon9  | c.G1163C   | p.S388T   |
| 11                        | 64455499  | 64455499  | <b>PPP2R5B</b> | G   | A   | GG | GA | GA | GA | H_AA_AB | PPP2R5B   | NA      | 0.995    | 0    | nonsynonymous SNV | NM_006244    | exon9  | c.G907A    | p.V303M   |
| 11                        | 88773158  | 88773159  | <b>NOX4</b>    | C   | G   | CC | CG | CG | CG | H_AA_AB | NOX4      | na      | 0.999    | 0.03 | nonsynonymous SNV | NM_001143837 | exon13 | c.G812C    | p.C271S   |
| 12                        | 21515202  | 21515202  | RECQL          | G   | A   | GG | GA | GA | GA | H_AA_AB | na        | na      | 0.639856 | na   | nonsynonymous SNV | NM_032941    | exon15 | c.C1765T   | p.Q589X   |
| 15                        | 87823678  | 87823679  | RHCG           | A   | C   | AA | CA | CA | CA | H_AA_AB | NA        | NA      | 0.826    | 0.01 | nonsynonymous SNV | NM_016321    | exon5  | c.T716G    | p.I239R   |
| 16                        | 52061903  | 52061903  | <b>RBL2</b>    | C   | G   | CC | GC | GC | GC | H_AA_AB | RBL2      | na      | 0.001    | 0.16 | nonsynonymous SNV | NM_005611    | exon16 | c.C2353G   | p.L785V   |
| 17                        | 7518305   | 7518305   | <b>TP53</b>    | T   | C   | TT | TC | TC | TC | H_AA_AB | TP53      | p.0?    | 1        | 0    | nonsynonymous SNV | NM_001126114 | exon7  | c.A701G    | p.Y234C   |
| 17                        | 40284218  | 40284219  | EFTUD2         | T   | C   | TT | CT | CT | CT | H_AA_AB | NA        | NA      | 0.819    | 0.08 | nonsynonymous SNV | NM_004247    | exon28 | c.A2869G   | p.M957V   |
| 19                        | 56201777  | 56201777  | KLK9           | C   | T   | CC | CT | CT | CT | H_AA_AB | NA        | NA      | 0.609    | 0.16 | nonsynonymous SNV | NM_012315    | exon3  | c.G215A    | p.R72H    |
| 19                        | 59474623  | 59474623  | LILRB2         | G   | T   | GG | TG | TG | TG | H_AA_AB | NA        | NA      | 0.609    | 0.17 | nonsynonymous SNV | NM_001080978 | exon6  | c.C811A    | p.Q271K   |
| 20                        | 42180607  | 42180607  | JPH2           | T   | A   | TT | TA | TA | TA | H_AA_AB | NA        | NA      | 0.815    | 0.01 | nonsynonymous SNV | NM_020433    | exon3  | c.A1240T   | p.I414F   |
| 20                        | 45697833  | 45697834  | <b>NCOA3</b>   | G   | T   | GG | GT | GT | GT | H_AA_AB | NCOA3     | NA      | 0.819    | 0.07 | nonsynonymous SNV | NM_001174087 | exon11 | c.G1473T   | p.K491N   |
| 20                        | 58005192  | 58005193  | <b>CDH26</b>   | G   | A   | GG | GA | GA | GA | H_AA_AB | CDH26     | NA      | 0.687    | 0.06 | nonsynonymous SNV | NM_177980    | exon13 | c.G2000A   | p.S667N   |
| X                         | 48256003  | 48256003  | <b>PORCN</b>   | A   | G   | AA | GA | GA | GA | H_AA_AB | PORCN     | NA      | 0.997    | 0    | nonsynonymous SNV | NM_203475    | exon5  | c.A638G    | p.Y213C   |
| <b>INTERMEDIATE H-AA</b>  |           |           |                |     |     |    |    |    |    |         |           |         |          |      |                   |              |        |            |           |
| 2                         | 45089300  | 45089300  | SIX2           | G   | A   | GG | GA | GA | GG | H_AA    | NA        | NA      | 0.999    | 0.01 | nonsynonymous SNV | NM_016932    | exon1  | c.C454T    | p.R152C   |
| 2                         | 220065631 | 220065631 | SPEG           | G   | A   | GG | AA | GA | GG | H-AA    | NA        | NA      | 0.997    | 0.02 | nonsynonymous SNV | NM_005876    | exon41 | c.G9683A   | p.R3228H  |
| 2                         | 153299787 | 153299787 | ARL6IP6        | C   | G   | CC | GC | GC | CC | H_AA    | NA        | NA      | 0.889    | 0    | nonsynonymous SNV | NM_152522    | exon3  | c.C488G    | p.A163G   |
| 2                         | 165504215 | 165504215 | SLC38A11       | C   | A   | CC | AC | AC | CC | H_AA    | NA        | NA      | 0.983    | 0.01 | nonsynonymous SNV | NM_173512    | exon4  | c.C294T    | p.K98N    |
| 7                         | 91956649  | 91956649  | PEX1           | C   | T   | CC | TC | TC | CC | H_AA    | NA        | NA      | 0.966    | 0    | nonsynonymous SNV | NM_000466    | exon23 | c.G3661A   | p.G1221R  |
| 7                         | 99500036  | 99500036  | ZSCAN21        | A   | G   | AA | GA | GA | AA | H_AA    | NA        | NA      | 0.957    | 0.01 | nonsynonymous SNV | NM_145914    | exon4  | c.A1282G   | p.S428G   |
| 7                         | 99634832  | 99634832  | STAG3          | C   | A   | CC | AC | AC | CC | H_AA    | NA        | NA      | 0.998    | 0    | nonsynonymous SNV | NM_012447    | exon15 | c.C1479A   | p.H493Q   |
| 8                         | 107765681 | 107765681 | OXR1           | C   | G   | CC | GC | GC | CC | H_AA    | NA        | NA      | 0.985    | 0.07 | nonsynonymous SNV | NM_018002    | exon6  | c.C443G    | p.S148C   |
| 9                         | 101030103 | 101030103 | SEC61B         | T   | G   | TT | GT | GT | TT | H_AA    | NA        | NA      | 0.954    | 0    | nonsynonymous SNV | NM_006808    | exon3  | c.T203G    | p.V68G    |
| 10                        | 101649813 | 101649813 | DNMBP          | C   | G   | CC | GC | GC | CC | H_AA    | NA        | NA      | 0.997    | 0.04 | nonsynonymous SNV | NM_015221    | exon7  | c.G2555C   | p.G852A   |
| 11                        | 13343659  | 13343659  | ARNTL          | C   | G   | CC | GC | GC | CC | H_AA    | NA        | NA      | 0.957    | 0    | nonsynonymous SNV | NM_001030272 | exon9  | c.C496G    | p.R166G   |
| 12                        | 53050389  | 53050389  | ZNF385A        | G   | C   | GG | CC | CG | GG | H-AA    | NA        | NA      | 0.998    | 0.01 | nonsynonymous SNV | NM_001130968 | exon7  | c.C836G    | p.P279R   |
| 13                        | 25865550  | 25865550  | <b>CDK8</b>    | A   | C   | AA | CA | CA | AA | H_AA    | CDK8      | NA      | 0.974    | 0.02 | nonsynonymous SNV | NM_001260    | exon7  | c.A693C    | p.E231D   |
| 19                        | 18174416  | 18174416  | <b>RAB3A</b>   | G   | T   | GG | GT | GT | GT | H_AA    | RAB3A     | NA      | 0.795    | 0    | nonsynonymous SNV | NM_002866    | exon2  | c.C135A    | p.D45E    |
| X                         | 77044852  | 77044852  | COX7B          | T   | A   | TT | AT | AT | TT | H_AA    | NA        | NA      | 0.998    | 0.03 | nonsynonymous SNV | NM_001866    | exon2  | c.T97A     | p.F33I    |
| <b>INTERMEDIATE AA-AB</b> |           |           |                |     |     |    |    |    |    |         |           |         |          |      |                   |              |        |            |           |
| 1                         | 85346432  | 85346432  | WDR63          | G   | T   | GG | GG | GT | GT | AA_AB   | NA        | NA      | 0.996    | 0    | nonsynonymous SNV | NM_145172    | exon15 | c.G1682T   | p.W561L   |
| 2                         | 55609611  | 55609611  | CCDC104        | C   | T   | CC | CC | CT | CT | AA_AB   | NA        | NA      | 0.723508 | 0.03 | stopgain SNV      | NM_080667    | exon4  | c.C376T    | p.R126X   |
| 2                         | 119632227 | 119632227 | C1QL2          | C   | G   | CC | CC | GC | GC | AA_AB   | NA        | NA      | 0.993    | 0.01 | nonsynonymous SNV | NM_182528    | exon1  | c.G89C     | p.R30P    |
| 2                         | 218458742 | 218458742 | TNS1           | C   | A   | CC | CC | CA | CA | AA_AB   | NA        | NA      | 0.958    | 0.07 | nonsynonymous SNV | NM_022648    | exon13 | c.G711T    | p.E237D   |
| 4                         | 79744486  | 79744486  | ANXA3          | G   | C   | GG | GG | GC | GC | AA_AB   | NA        | NA      | 1        | 0    | nonsynonymous SNV | NM_005139    | exon12 | c.G821C    | p.R274P   |
| 6                         | 42017268  | 42017268  | <b>CCND3</b>   | C   | G   | CC | CC | GC | GC | AA_AB   | CCND3     | NA      | 0.155    | 0.07 | nonsynonymous SNV | NM_001136125 | exon1  | c.G98C     | p.R33P    |
| 9                         | 138519119 | 138519119 | <b>NOTCH1</b>  | C   | A   | CC | CC | CA | CA | AA_AB   | NOTCH1    | p.A1611 | 0.98     | 0.08 | nonsynonymous SNV | NM_017617    | exon26 | c.G4845T   | p.M1615I  |
| 12                        | 48029398  | 48029398  | DNAJC22        | C   | T   | CC | CC | TC | TT | AA_AB   | NA        | NA      | 0.881    | 0.02 | nonsynonymous SNV | NM_024902    | exon2  | c.C476T    | p.A159V   |
| 19                        | 19488123  | 19488123  | NDUFA13        | C   | T   | CC | TT | CT | CC | AA_AB   | NA        | NA      | 0.533729 | 0.05 | nonsynonymous SNV | NM_015965    | exon1  | c.C76T     | p.P265S   |
| X                         | 39818786  | 39818786  | <b>BCOR</b>    | C   | T   | CC | CC | TC | TC | AA_AB   | BCOR      | NA      | 0.822    | 0    | nonsynonymous SNV | NM_017745    | exon4  | c.G757A    | p.V253I   |

|                |           |           |                |   |    |    |    |    |    |       |         |     |          |      |                   |              |        |           |          |
|----------------|-----------|-----------|----------------|---|----|----|----|----|----|-------|---------|-----|----------|------|-------------------|--------------|--------|-----------|----------|
| X              | 49013974  | 49013974  | PPP1R3F        | C | G  | CC | CC | GC | GC | AA_AB | NA      | NA  | 0.997    | 0    | nonsynonymous SNV | NM_033215    | exon1  | c.C698G   | p.S233W  |
| <b>LATE H</b>  |           |           |                |   |    |    |    |    |    |       |         |     |          |      |                   |              |        |           |          |
| 10             | 73228920  | 73228920  | CDH23          | G | T  | GG | TG | GG | GG | H     | NA      | NA  | NA       | 0.02 | nonsynonymous SNV | NM_001171933 | exon4  | c.G381T   | p.W127C  |
| 14             | 74064993  | 74064993  | LTBP2          | G | C  | GG | CG | GG | GG | H     | NA      | NA  | 0.992    | 0    | nonsynonymous SNV | NM_000428    | exon12 | c.C2314G  | p.P772A  |
| 22             | 36450653  | 36450654  | <b>TRIOBP</b>  | C | CC | TC | CC | CC |    | H     | NA      | NA  | 1        | 0.03 | nonsynonymous SNV | NM_001039141 |        | c.C3325A  | p.V538G  |
| <b>LATE AA</b> |           |           |                |   |    |    |    |    |    |       |         |     |          |      |                   |              |        |           |          |
| 3              | 135175310 | 135175310 | SLCO2A1        | A | T  | AA | AA | TA | AA | AA    | NA      | NA  | 0.997    | 0    | nonsynonymous SNV | NM_005630    | exon3  | c.T284A   | p.V95E   |
| 4              | 151443356 | 151443356 | LRBA           | C | G  | CC | CC | CG | CC | AA    | NA      | NA  | 0.98     | 0.01 | nonsynonymous SNV | NM_001199282 | exon53 | c.G7888C  | p.V2630L |
| 16             | 29905282  | 29905282  | TAOK2          | C | T  | CC | CC | CT | CC | AA    | NA      | NA  | 0.73533  | 0    | stopgain SNV      | NM_016151    | exon16 | c.C2188T  | p.Q730X  |
| 16             | 69065993  | 69065993  | FUK            | C | T  | CC | CC | CT | CC | AA    | NA      | NA  | 0.735252 | 0.04 | stopgain SNV      | NM_145059    | exon17 | c.C2050T  | p.Q684X  |
| 21             | 29333268  | 29333268  | USP16          | G | A  | GG | GG | GA | GG | AA    | NA      | NA  | 0.999    | 0.04 | nonsynonymous SNV | NM_001032410 | exon9  | c.G783A   | p.M261I  |
| <b>LATE AB</b> |           |           |                |   |    |    |    |    |    |       |         |     |          |      |                   |              |        |           |          |
| 1              | 24013270  | 24013270  | HMGCL          | C | G  | CC | CC | CC | GC | AB    | NA      | NA  | 1        | 0    | nonsynonymous SNV | NM_000191    | exon5  | c.G494C   | p.R165P  |
| 1              | 64911705  | 64911705  | CACHD1         | G | C  | GG | GG | GG | CG | AB    | NA      | NA  | 0.882    | 0    | nonsynonymous SNV | NM_020925    | exon19 | c.G2544C  | p.Q848H  |
| 1              | 149206772 | 149206772 | CERS2          | G | C  | GG | GG | GG | CG | AB    | NA      | NA  | 1        | 0    | nonsynonymous SNV | NM_022075    | exon6  | c.C511G   | p.P171A  |
| 1              | 158423091 | 158423091 | ATP1A4         | T | G  | TT | TT | TT | TG | AB    | NA      | NA  | 0.001    | 0    | nonsynonymous SNV | NM_001001734 | exon5  | c.T476G   | p.V159G  |
| 1              | 202679223 | 202679223 | <b>PIK3C2B</b> | T | C  | TT | TT | TT | CT | AB    | PIK3C2B | NA  | 0.002    | 0.36 | nonsynonymous SNV | NM_002646    | exon20 | c.A2993G  | p.N998S  |
| 1              | 203540220 | 203540220 | NUAK2          | G | C  | GG | GG | GG | CG | AB    | NA      | NA  | 1        | 0    | nonsynonymous SNV | NM_030952    | exon7  | c.C868G   | p.R290G  |
| 2              | 8837329   | 8837329   | KIDINS220      | G | T  | GG | GG | GG | TG | AB    | NA      | NA  | 0.999    | 0.03 | nonsynonymous SNV | NM_020738    | exon18 | c.C2296A  | p.Q766K  |
| 2              | 27163654  | 27163654  | KHK            | G | C  | GG | GG | GG | GC | AB    | NA      | NA  | 0.996    | 0.03 | nonsynonymous SNV | NM_000221    | exon1  | c.G23C    | p.C8S    |
| 2              | 31423213  | 31423213  | XDH            | C | A  | CC | CC | CC | AC | AB    | NA      | NA  | 0        | 0.04 | nonsynonymous SNV | NM_000379    | exon30 | c.G3277T  | p.A1093S |
| 2              | 43955913  | 43955913  | ABCG8          | T | G  | TT | TT | TT | TG | AB    | NA      | NA  | 0.722    | 0.08 | nonsynonymous SNV | NM_022437    | exon11 | c.T1613G  | p.V538G  |
| 2              | 196367387 | 196367387 | DNAH7          | C | A  | CC | CC | CC | AC | AB    | NA      | NA  | 0.999    | NA   | nonsynonymous SNV | NM_018897    | exon57 | c.G10636T | p.G3546C |
| 2              | 241914187 | 241914187 | SEPT2          | C | A  | CC | CC | CC | AC | AB    | NA      | NA  | 1        | 0    | nonsynonymous SNV | NM_006155    | exon3  | c.C116A   | p.T39K   |
| 6              | 158436929 | 158436929 | SYNJ2          | C | A  | CC | CC | CC | CA | AB    | NA      | NA  | 0.567    | 0    | nonsynonymous SNV | NM_001178088 | exon26 | c.C3325A  | p.L1109M |
| 7              | 116320322 | 116320322 | <b>CAPZA2</b>  | G | T  | GG | GG | GG | TG | AB    | CAPZA2  | NA  | 0.735424 | 0.04 | stopgain SNV      | NM_006136    | exon3  | c.G142T   | p.E48X   |
| 8              | 12627648  | 12627648  | <b>LONRF1</b>  | G | A  | GG | GG | GG | GA | AB    | LONRF1  | NA  | 0.735526 | 0.03 | stopgain SNV      | NM_152271    | exon11 | c.C2122T  | p.Q708X  |
| 8              | 124273249 | 124273249 | FAM83A         | T | C  | TT | TT | TT | CT | AB    | NA      | NA  | 1        | 0    | nonsynonymous SNV | NM_032899    | exon2  | c.T506C   | p.F169S  |
| 9              | 139057259 | 139057259 | NPDC1          | A | C  | AA | AA | AA | CA | AB    | NA      | NA  | 0.981    | 0    | nonsynonymous SNV | NM_015392    | exon2  | c.T200G   | p.L67R   |
| 10             | 126681614 | 126681614 | CTBP2          | G | A  | GG | GG | GG | AG | AB    | NA      | NA  | 0.982    | 0    | nonsynonymous SNV | NM_001329    | exon5  | c.C263T   | p.T88I   |
| 11             | 36475355  | 36475355  | TRAF6          | C | T  | CC | CC | CC | TC | AB    | NA      | NA  | 1        | 0    | nonsynonymous SNV | NM_145803    | exon5  | c.G485A   | p.C162Y  |
| 12             | 6897561   | 6897561   | ENO2           | C | T  | CC | CC | CC | TC | AB    | NA      | NA  | 0.997    | 0    | nonsynonymous SNV | NM_001975    | exon7  | c.C641T   | p.A214V  |
| 16             | 28748729  | 28748729  | ATXN2L         | C | T  | CC | CC | CC | CT | AB    | NA      | NA  | 0.996    | 0    | nonsynonymous SNV | NM_148416    | exon8  | c.C883T   | p.R295C  |
| 17             | 71582716  | 71582716  | GALR2          | G | T  | GG | GG | GG | TG | AB    | NA      | NA  | 0.721    | 0.06 | nonsynonymous SNV | NM_003857    | exon1  | c.G157T   | p.G53C   |
| 17             | 76537879  | 76537879  | <b>RPTOR</b>   | G | T  | GG | GG | GG | TG | AB    | RPTOR   | NA  | 0.735446 | 0.09 | stopgain SNV      | NM_020761    | exon28 | c.G3307T  | p.E1103X |
| 18             | 20310787  | 20310787  | HRH4           | G | A  | GG | GG | GG | GA | AB    | NA      | NA  | 0.883    | 0.04 | nonsynonymous SNV | NM_021624    | exon3  | c.G436A   | p.V146M  |
| 19             | 10999535  | 10999535  | <b>SMARCA4</b> | C | G  | CC | CC | CC | GC | AB    | NA      | p.? | 0.999    | 0    | nonsynonymous SNV | NM_001128845 | exon23 | c.C3291G  | p.H1097Q |
| 19             | 50546058  | 50546058  | KLC3           | G | C  | GG | GG | GG | CG | AB    | NA      | NA  | 0.862    | 0    | nonsynonymous SNV | NM_177417    | exon12 | c.G1386C  | p.K462N  |
| 22             | 31267569  | 31267569  | SYN3           | T | G  | TT | TT | TT | GT | AB    | NA      | NA  | 0.788891 | 0    | nonsynonymous SNV | NM_001135774 | exon8  | c.A902C   | p.Y301S  |

## SUPPLEMENTAL TABLE 2 - INDELS DETECTED IN THE CODING REGIONS OF TUMOR SUBPOPULATIONS

| chrom | position | gene     | REF | VAR          | Sub     | Cancer | mut_class               | genbank      | exon   | nucleotide     | amino_acid     |
|-------|----------|----------|-----|--------------|---------|--------|-------------------------|--------------|--------|----------------|----------------|
| chr22 | 36813121 | BAIAP2L2 | A   | insCATGGAGGT | H_AA_AB | NA     | nonframeshift insertion | NM_025045    | exon11 | c.1215_1216ins | p.S406delins   |
| chr11 | 76573419 | MYO7A    | G   | del22bp      | H_AA_AB | NA     | frameshift deletion     | NM_001127179 | exon27 | c.3514_3535del | p.1172_1179del |
| chr1  | 1.2E+08  | ADAM30   | C   | del_C        | AA_AB   | NA     | frameshift deletion     | NM_021794    | exon1  | c.2290delG     | p.A764fs       |
| chr19 | 12997227 | NFIX     | C   | del_C        | AA_AB   | NA     | frameshift deletion     | NM_001271043 | exon2  | c.444delC      | p.I148fs       |
| chr11 | 65062348 | SCYL1    | G   | del_GGGA     | AA_AB   | NA     | frameshift deletion     | NM_001048218 | exon17 | c.2228_2231del | p.743_744del   |

**Supplemental Table 3 - Structural Variants and Copy Number Abberations in Tumor Subpopulations**

| EARLY SVs        |       |            |       |            |                 |         |           |          |           |
|------------------|-------|------------|-------|------------|-----------------|---------|-----------|----------|-----------|
| Type             | chrA  | chrA_start | chrB  | chrB_start | Gene Name(s)    | Sub     | size (bp) | region   | Method    |
| INS              | chr11 | 100480573  | chr11 | 100472903  | PGR             | AA,AB,H | 7670      | intronic | CREST     |
| INS              | chr17 | 56362930   | chr17 | 56350448   | BCAS3           | AA,AB,H | 12482     | intronic | CREST     |
| DEL              | chr13 | 38984211   | chr13 | 38984285   | LHFP            | AA,AB,H | 74        | intronic | SRM       |
| DEL              | chr9  | 20353001   | chr9  | 20354059   | MLLT3           | AA,AB,H | 1058      | exon5    | SRM       |
| INTERMEDIATE SVs |       |            |       |            |                 |         |           |          |           |
| DEL              | chr20 | 39145037   | chr20 | 39145097   | TOP1            | AA,AB   | 60        | intron   | SRM       |
| DEL              | chr21 | 35085983   | chr21 | 35131642   | RUNX1           | AA,AB   | 45659     | 3'UTR    | SRM       |
| DEL              | chr3  | 157111517  | chr3  | 157112834  | GMPS            | AA,AB   | 1317      | intron   | SRM       |
| DEL              | chr7  | 92172871   | chr7  | 92173002   | CDK6            | AA,AB   | 131       | intron   | SRM       |
| DEL              | chr14 | 55202458   | chr14 | 55202509   | KTN1            | AA,AB   | 51        | intron   | SRM,CREST |
| DUP              | chr7  | 137885296  | chr7  | 137908932  | TRIM24          | AA,AB   | 23636     | intron   | SRM       |
| INTRA            | chr14 | 91560812   | chr14 | 99049952   | TRIP11:C14orf65 | AA,AB   | na        | exon     | SRM,CREST |
| INS              | chr9  | 92605259   | chr9  | 85556060   | SYK             | AB,H    | 7049199   | intron   | CREST     |
| INTER            | chr10 | 123338198  | chr11 | 124189007  | FGFR2:BC036195  | AB,H    | na        | intron   | SRM       |
| LATE SVs         |       |            |       |            |                 |         |           |          |           |
| DEL              | chr1  | 143649461  | chr1  | 143649664  | PDE4DIP         | AA      | 203       | intron   | CREST     |
| DEL              | chr8  | 128818158  | chr8  | 128819005  | MYC             | AB      | 847       | intron   | CREST     |
| INS              | chr10 | 22068850   | chr10 | 21214251   | MLLT10          | AB      | 854599    | intron   | CREST     |
| DEL              | chr22 | 39230128   | chr22 | 39230185   | MKL1            | AB      | 57        | intron   | SRM       |
| AMP              | chr12 | 22072826   | chr12 | 26085603   | KRAS ++         | AB      | 4012777   | genes    | VARBIN    |
| DEL              | chr5  | 101715241  | chr5  | 109773692  | EFNA5 ++        | AB      | 8058451   | genes    | VARBIN    |
| DEL              | chr19 | 1279911    | chr19 | 4634233    | COL5A ++        | AB      | 3354322   | genes    | VARBIN    |

**Supplemental Table 4 - Overlap between SNVs and LOH blocks**

|              |                    | LOH Genotype |        |       |       |      |      |       |       |
|--------------|--------------------|--------------|--------|-------|-------|------|------|-------|-------|
|              |                    | AA, AB, H    | AA, AB | AA, H | AB, H | AA   | AB   | H     | None  |
| SNV Genotype | AA, AB, H (n=3911) | 22.0%        | 0.0%   | 2.6%  | 0.2%  | 0.0% | 4.7% | 3.9%  | 66.6% |
|              | AA, AB (n=3047)    | 23.2%        | 0.0%   | 6.3%  | 1.8%  | 0.0% | 4.9% | 10.1% | 53.8% |
|              | AA, H (n=2789)     | 23.7%        | 0.1%   | 3.0%  | 2.2%  | 0.0% | 9.2% | 3.1%  | 58.7% |
|              | AB,H (n=29)        | 24.1%        | 0.0%   | 0.0%  | 0.0%  | 0.0% | 0.0% | 10.3% | 65.5% |
|              | AA (n=2803)        | 37.4%        | 0.0%   | 2.9%  | 1.5%  | 0.0% | 5.5% | 7.3%  | 45.4% |
|              | AB (n=4863)        | 24.4%        | 0.0%   | 3.8%  | 0.9%  | 0.0% | 3.8% | 5.9%  | 61.2% |
|              | H (n=188)          | 33.0%        | 0.0%   | 1.1%  | 0.5%  | 0.0% | 8.0% | 2.7%  | 54.8% |
|              | Expected (n=17630) | 38.1%        | 0.1%   | 2.8%  | 1.9%  | 0.0% | 4.5% | 6.5%  | 46.1% |
